# Supplementary material for: Post-cyclization of a bisimine-linked covalent organic framework to enhance the performance of visible-light photocatalytic hydrogen evolution
Source: Royal Society of Chemistry journal article supplement (doi:10.1039/d3py00181d), 2023-01-01
Supplement: d3py00181d1.pdf [file d3py00181d1.pdf]

## Electronic Supplementary Information

# Post-Cyclization of a Bisimine-Linked Covalent Organic Framework to Enhance the Performance of Visible-Light Photocatalytic Hydrogen Evolution

*Huanyu Liu,<sup>a</sup> Yueting Li,<sup>a</sup> Lu Dai,<sup>a</sup> Xiangjian Meng,<sup>a</sup> Anwang Dong,<sup>a</sup> Zimo Zhou,<sup>a</sup> Huixia Lv,<sup>a</sup> Pengfei Li,<sup>\*, a</sup> and Bo Wang<sup>a, b</sup>*

<sup>a</sup>Frontiers Science Center for High Energy Material, Key Laboratory of Cluster Science Ministry of Education, Beijing Key Laboratory of Photoelectronic/Electrophotonic Conversion Materials, Advanced Research Institute of Multidisciplinary Science, School of Chemistry and Chemical Engineering, Beijing Institute of Technology, Beijing, 100081, China

<sup>b</sup>Advanced Technology Research Institute (Jinan), Beijing Institute of Technology, Jinan, 250300, China

\*E-mail: lipengfei@bit.edu.cn

## **Table of Contents**

|                                                               |           |
|---------------------------------------------------------------|-----------|
| <b>Section S1. Reagents and Instruments .....</b>             | <b>3</b>  |
| <b>Section S2. Synthetic procedures and measurements.....</b> | <b>5</b>  |
| <b>Section S3. Characterizations .....</b>                    | <b>9</b>  |
| <b>Section S4. References .....</b>                           | <b>36</b> |

## *Section S1. Reagents and Instruments*

**Reagents:** All chemicals were commercially available and used without further purification. The 4,4',4'',4'''-(pyrene-1,3,6,8-tetrayl) tetraaniline was purchased from Bide Pharmatech Ltd.  $\text{H}_2\text{PtCl}_6$  was purchased from MACKLIN. Ascorbic acid was purchased from TCI. Glyoxal (40% aqueous solution), 1,4-dioxane, benzyl alcohol, mesitylene, tetrahydrofuran, chloromethyl ethyl ether, methanol, and acetone were purchased from Beijing Chemical Regent Company.

**Instruments:** Fourier transform infrared (FT-IR) spectra were collected in the range of 400–4000  $\text{cm}^{-1}$  on Bruker ALPHA spectrometer. Powder X-ray diffraction (PXRD) analysis was carried out on a Rigaku MiniFlex 600 diffractometer operating at 40 kV voltage and 15 mA current with  $\text{Cu-K}\alpha$  X-ray radiation ( $\lambda = 0.154056$  nm). Thermogravimetric analysis (TGA, Shimadzu DTG-60) was performed from room temperature to 800 °C at a heating rate of 10 °C/min and a  $\text{N}_2$  flow rate of 50 mL/min. The nitrogen physisorption experiment was conducted at 77 K on a Quantachrome Instrument Autosorb-iQ after pretreatment. The specific surface areas were calculated by the Brunauer–Emmett–Teller (BET) method. The pore size distribution was evaluated by the non-local density functional theory (NLDFT).  $^1\text{H}$  and  $^{13}\text{C}$  nuclear magnetic resonance (NMR) spectra were recorded by a Bruker Advance III 400 MHz or 500 MHz NMR spectrometer. Solid-state  $^{13}\text{C}$  CP/MAS NMR spectra were performed on a Bruker AVANCE III 700 MHz NMR spectrometer. Scanning electron microscopy (SEM) images were acquired from a JEOL model JSM-7500F scanning electron microscope. The samples were sputter-coated with platinum layers to increase their conductivity before observation. Transmission electron microscopy (TEM) images were collected on JEOL JEM-2100 transmission electron microscopes operating at 200 kV. Electrochemical tests were carried out on a CHI760E electrochemical workstation. UV/Visible diffuse-reflectance (UV/Vis DRS) spectra were collected on a Shimadzu

Corporation UV-2600 spectrometer. Photoluminescence and time-resolved PL decay spectra were collected on a Horiba FluoroLog-3 under air. Electron paramagnetic resonance (EPR) spectra were recorded on a JEOL JES-FA200 spectrometer. The content of platinum was measured by inductively coupled plasma-mass spectrometry (ICP-MS).

**Section S2. Synthetic procedures and measurements**

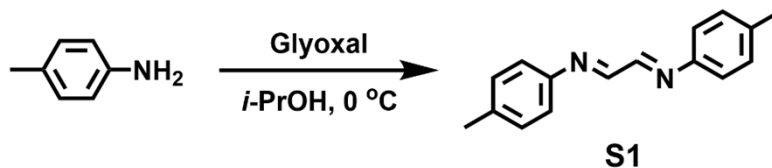

**Scheme S1.** The synthesis of model compound S1.

**Model Compound S1**

Glyoxal (0.636 mL, 5 mmol, 1.0 eq.) was added to a stirred solution of 4-methylaniline (1.07 g, 10.0 mmol, 2.0 eq.) in isopropyl alcohol at 0 °C. The resulting solution was stirred for 4 h. The precipitate was filtered, washed with isopropyl alcohol and dried under vacuum to give a yellow powder. <sup>1</sup>H NMR (400 MHz, CDCl<sub>3</sub>) δ 8.41 (s, 2H), 7.26 (br. s, 8H), 2.39 (s, 6H). <sup>13</sup>C NMR (125 MHz, CDCl<sub>3</sub>) δ 160.5 (s), 147.6 (s), 138.2 (s), 130.1(s), 121.4(s), 21.2(s). The <sup>1</sup>H NMR and <sup>13</sup>C NMR spectra of model compound S1 are consistent with previously reported.<sup>1</sup>

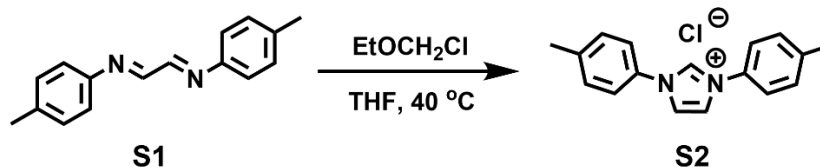

**Scheme S2.** The synthesis of model compound S2.

**Model Compound S2**

A solution of chloromethyl ethyl ether (574 μL, 6 mmol, 1.5 eq.) was added dropwise to a stirred solution of the model compound S1 (946 mg, 4 mmol, 1.0 eq.) in EtOAc at room temperature under N<sub>2</sub>. The resulting solution was stirred for 16 h. The precipitate was filtered, washed with EtOAc (20 mL) and dried under vacuum to give the model compound S2. <sup>1</sup>H NMR (400 MHz, CDCl<sub>3</sub>) δ 11.67 (s, 1H), 7.96 (d, *J* = 8.0 Hz, 4H), 7.72 (s, 2H), 7.41 (d, *J* = 8.0 Hz, 4H), 2.42 (s, 6H); <sup>13</sup>C NMR (125 MHz, CD<sub>3</sub>OD) δ 140.9 (s), 132.6 (s), 130.6 (s), 130.3(s), 122.2(s), 19.7(s).

The  $^1\text{H}$  NMR and  $^{13}\text{C}$  NMR spectra of model compound S2 are consistent with previously reported.<sup>1</sup>

### **PyG-COF**

PyTTA (22.6 mg, 0.4 mmol, 1.0 eq.) and glyoxal (10.1  $\mu\text{L}$ , 0.8 mmol, 2.0 eq.) were mixed in a Schlenk tube. After that, mesitylene (1 mL), benzyl alcohol (1 mL) and 6 M acetic acid (HOAc) (0.2 mL) were added. The resultant mixture was ultrasonicated for 5 min, and then degassed through three freeze-pump-thaw cycles and sealed under vacuum. The suspension was heated at 120  $^\circ\text{C}$  and left undisturbed for 3 days. The orange solid was isolated by filtration and washed with anhydrous tetrahydrofuran and acetone.

### **PyG-Im-COF**

An oven-dried flask was charged with PyG-COF (30 mg), chloromethyl ethyl ether (10  $\mu\text{L}$ ), and anhydrous tetrahydrofuran (15 mL) under  $\text{N}_2$ . The flask was heated at 40  $^\circ\text{C}$  and stirred for 2 days. The resultant solid was isolated by filtration and washed with anhydrous ethyl acetate, and then dried under vacuum to afford a yellow solid.

### **Photoelectrochemical measurement**

To fabricate the working electrode, 5 mg of COF, 1 mL of ethanol, and 10  $\mu\text{L}$  of 5% Nafion in water were mixed under sonication for 30 min to make the sample fully dispersed. The resultant slurry was dropped onto a piece of fluoride-tin oxide (FTO) glass substrate with a cover area of 0.25  $\text{cm}^2$ . The uncovered parts of the electrode were coated with epoxy. The working electrode was dried in air naturally. The photocurrents were recorded by an electrochemical workstation equipped with a conventional three-electrode cell. A platinum plate electrode and an Ag/AgCl electrode were used as the counter electrode and the reference electrode, respectively. The electrodes were immersed in a 0.2 M aqueous  $\text{Na}_2\text{SO}_4$  solution. The working electrode was

illuminated by a 300 W Xe lamp (PLS-SXE300C) with a 420 nm cut-off filter from the backside. Each measurement was repeated three times under ambient conditions.

### **Photocatalytic measurement**

COFs (10 mg) were dispersed in 15 mL of 0.1 M ascorbic acid aqueous solution, sonicated for 15 min to obtain a uniformly dispersed suspension, and then 10  $\mu\text{L}$  of 40  $\text{mg L}^{-1}$   $\text{H}_2\text{PtCl}_6$  was added. The mixed suspension was transferred to a glass reactor of the Labsolar-6A photocatalytic equipment. After the whole reaction system was evacuated to remove the air in the system, a 300 W Xe lamp ( $\lambda > 420$  nm) was used to irradiate the suspension. Circulating cooling water was used to keep the whole reaction system at 5  $^\circ\text{C}$ . Before the photocatalytic hydrogen production,  $\text{H}_2\text{PtCl}_6$  was reduced for one hour to *in situ* form Pt nanoparticles. During the photocatalytic reaction, the generated gas product was analyzed by GC-2014C gas chromatography, which was sampling for every 30 min in 4 hours.

### **Determination of apparent quantum yield**

The measurement of apparent quantum yield for photocatalytic hydrogen production of COFs is similar to the procedure in photocatalytic measurement under 300 W Xe lamp with different monochromatic filters (420, 450, 500, 520, and 550 nm). Using an optical power meter (Thorlabs PM100D), the optical power density at each wavelength was 10.2  $\text{mW cm}^{-2}$ , and the light emission area was 19.6  $\text{cm}^2$ . The AQY was calculated by using the following equation based on the amount of hydrogen produced in the photocatalytic reaction within one hour.

$$\eta_{AQY} = \frac{2 \times M \times N_A \times h \times c}{S \times P \times t \times \lambda} \times 100\%$$

Where,  $M$  is the amount of  $\text{H}_2$ ,  $N_A$  is the Avogadro constant ( $6.02 \times 10^{23} \text{ mol}^{-1}$ ),  $h$  is the Planck constant ( $6.626 \times 10^{-34} \text{ J}\cdot\text{s}$ ),  $c$  is the speed of light ( $3 \times 10^8 \text{ m s}^{-1}$ ),  $S$  is the irradiation area ( $\text{cm}^2$ ),  $P$  is the intensity of irradiation light ( $\text{W cm}^{-2}$ ),  $t$  is the photoreaction time (s),  $\lambda$  is the wavelength of

the monochromatic light (nm).



Section S3. Characterizations

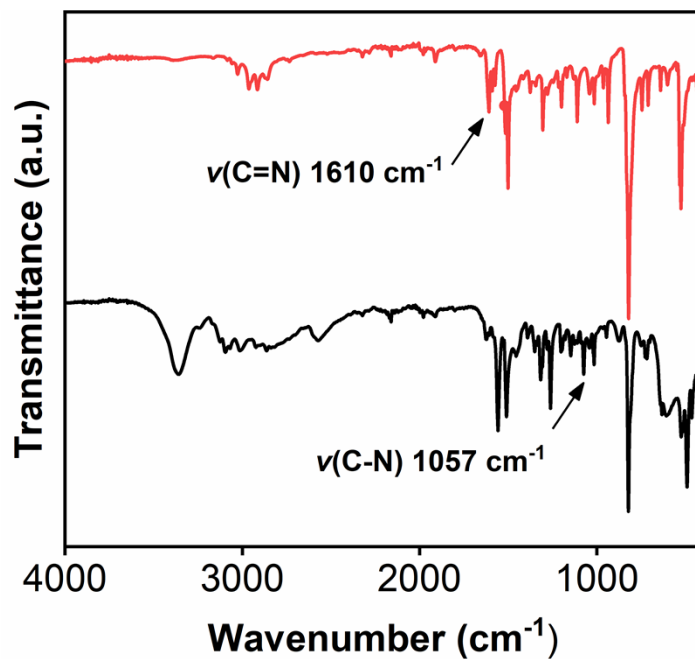

Figure S1. FT-IR spectra of model compound S1 (red) and model compound S2 (black).

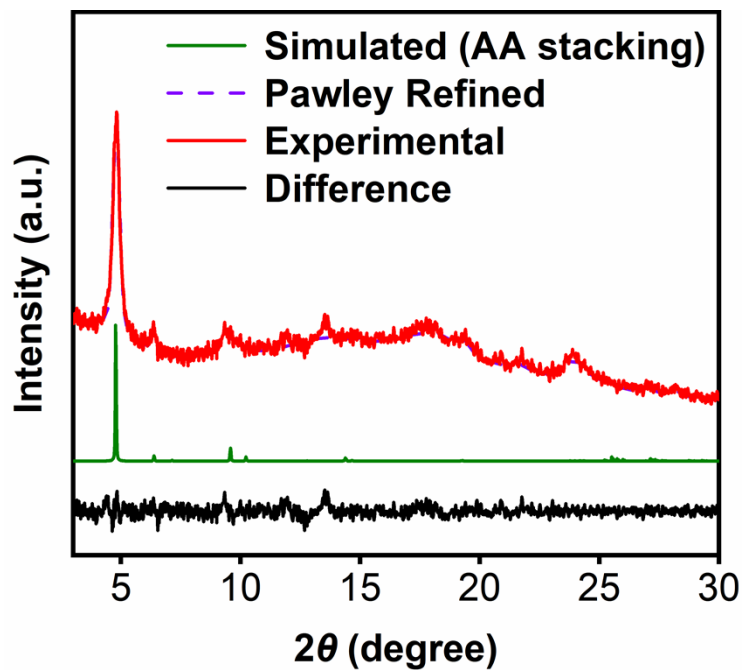

Figure S2. Comparison of experimental and simulated PXRD of PyG-COF.

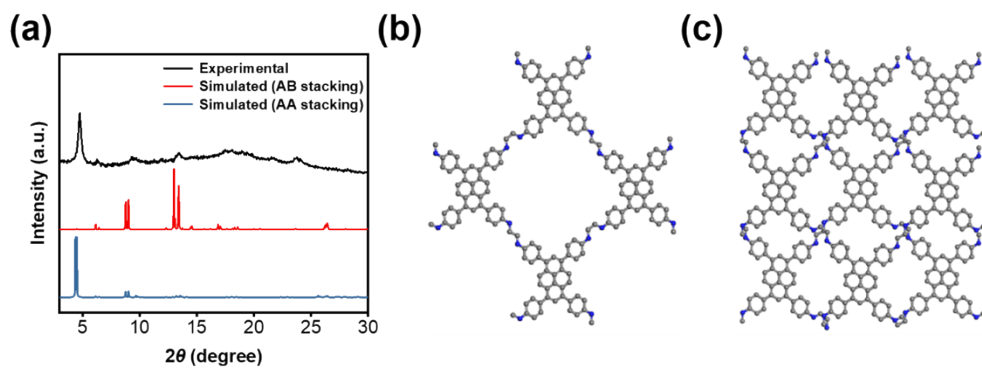

**Figure S3.** (a) The comparison of experimental and simulated PXR D patterns of PyG-COF in structural model 1. (b-c) The AA stacking and AB stacking of structural model 1.

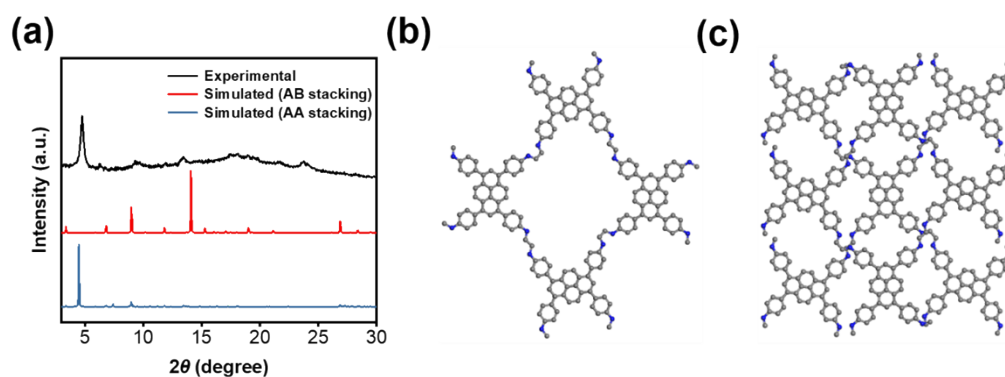

**Figure S4.** (a) The comparison of experimental and simulated PXR D patterns of PyG-COF in structural model 2. (b-c) The AA stacking and AB stacking of structural model 2.

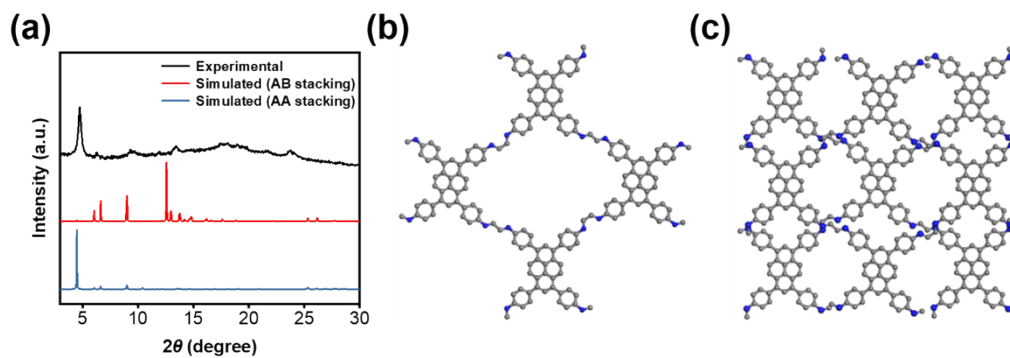

**Figure S5.** (a) The comparison of experimental and simulated PXR D patterns of PyG-COF in structural model 3. (b-c) The AA stacking and AB stacking of structural model 3.

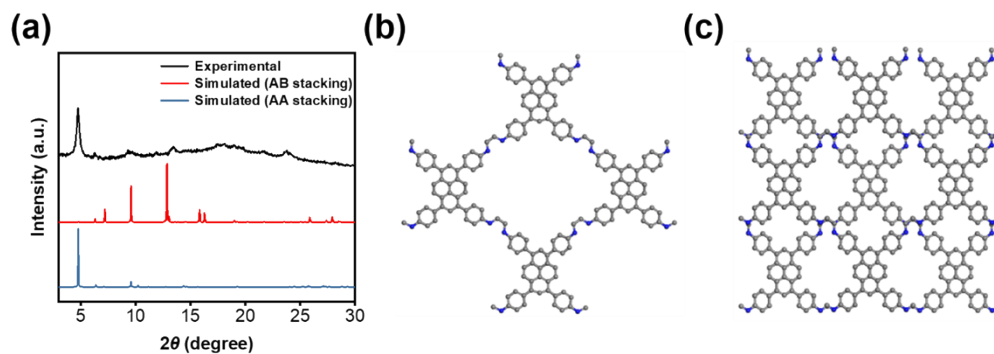

**Figure S6.** (a) The comparison of experimental and simulated PXR D patterns of PyG-COF in structural model 4. (b-c) The AA stacking and AB stacking of structural model 4.

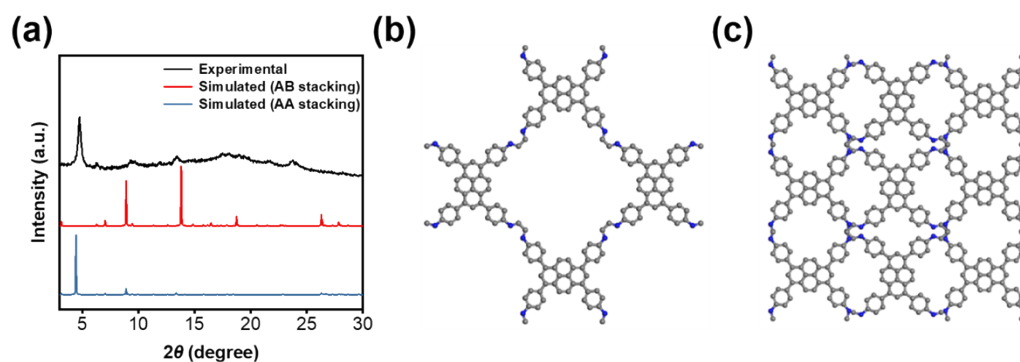

**Figure S7.** (a) The comparison of experimental and simulated PXR D patterns of PyG-COF in structural model 5. (b-c) The AA stacking and AB stacking of structural model 5.

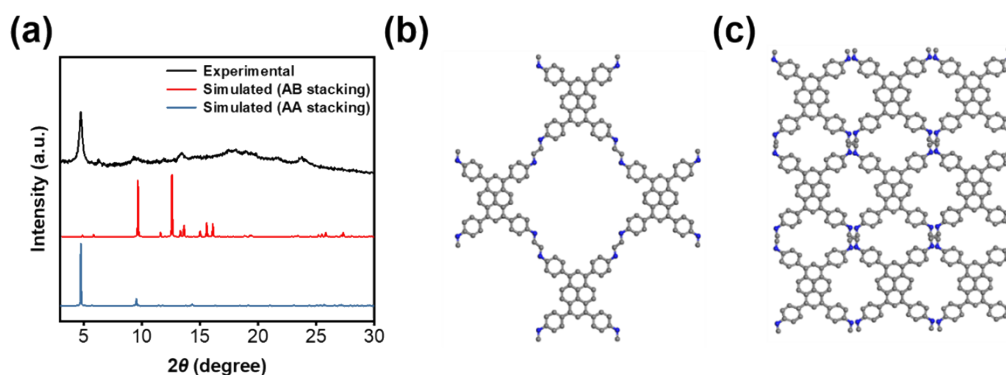

**Figure S8.** (a) The comparison of experimental and simulated PXR D patterns of PyG-COF in structural model 6. (b-c) The AA stacking and AB stacking of structural model 6.

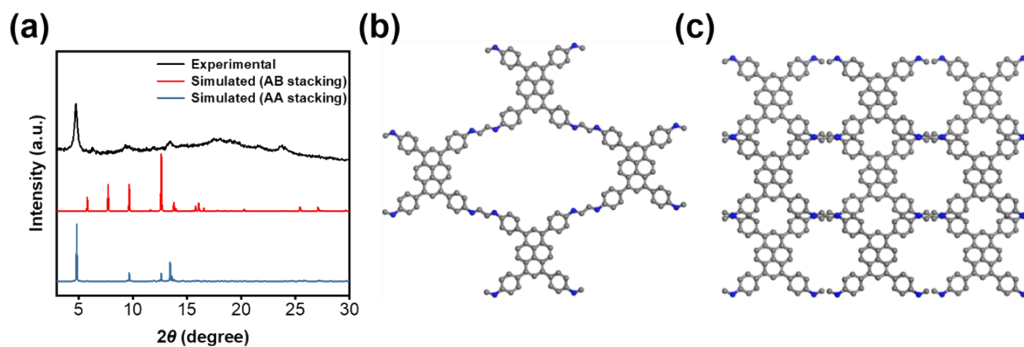

**Figure S9.** (a) The comparison of experimental and simulated PXR D patterns of PyG-COF in structural model 7. (b-c) The AA stacking and AB stacking of structural model 7.

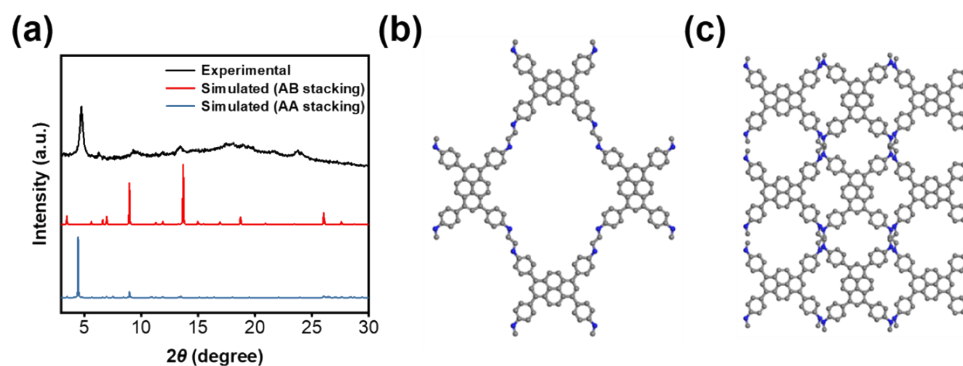

**Figure S10.** (a) The comparison of experimental and simulated PXR D patterns of PyG-COF in structural model 8. (b-c) The AA stacking and AB stacking of structural model 8.

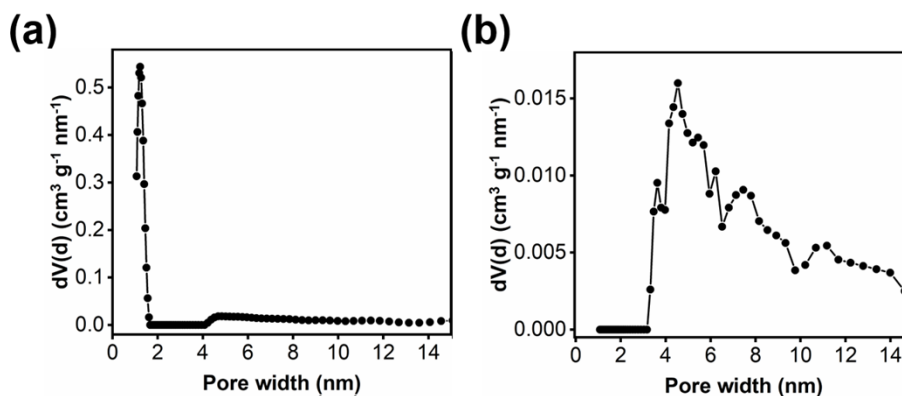

**Figure S11.** Pore size distributions for (a) PyG-COF and (b) PyG-Im-COF.

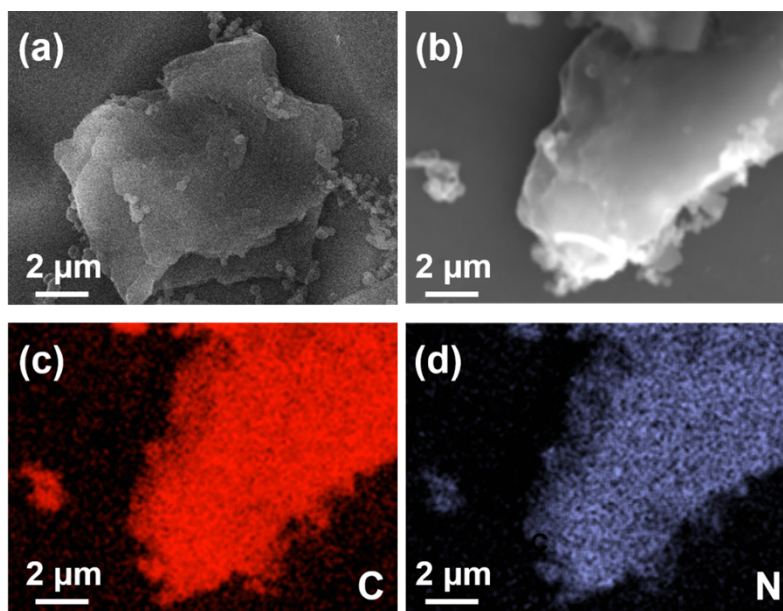

**Figure S 12.** SEM images of (a-b) PyG-COF and (c-d) EDS elemental mapping of PyG-COF.

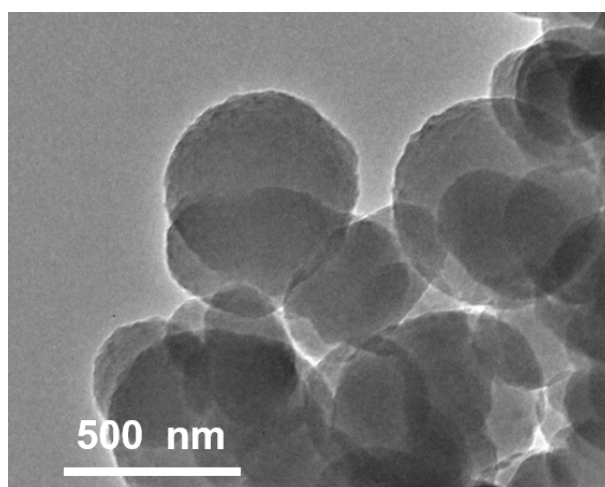

**Figure S13.** TEM image of PyG-COF.

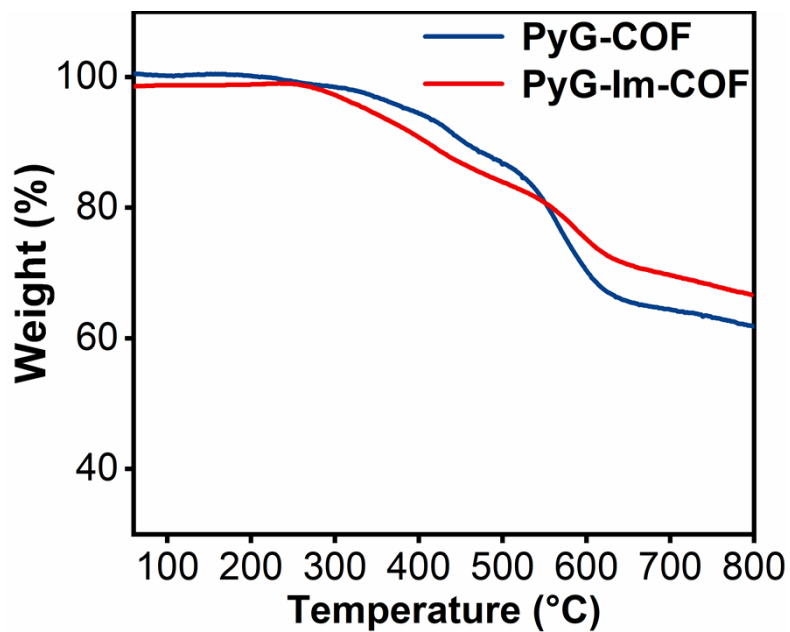

**Figure S14.** TGA curves of PyG-COF and PyG-Im-COF.

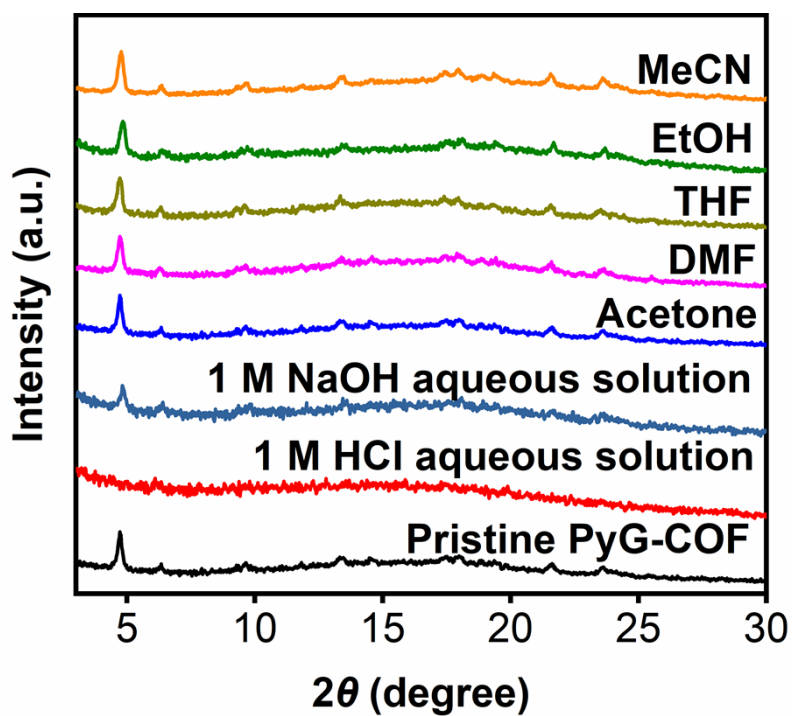

**Figure S15.** PXRD patterns of PyG-COF after treated upon different organic solvents for 2 days.

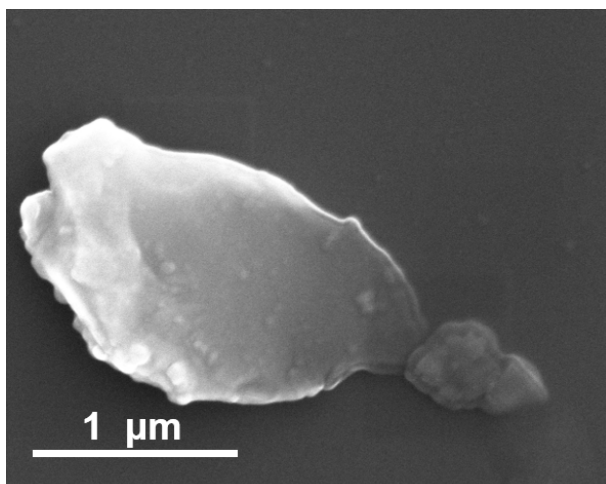

**Figure S16.** SEM image of PyG-Im-COF.

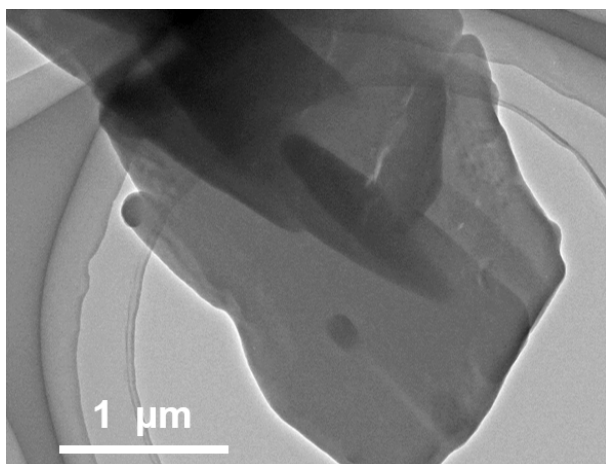

**Figure S17.** TEM image of PyG-Im-COF.

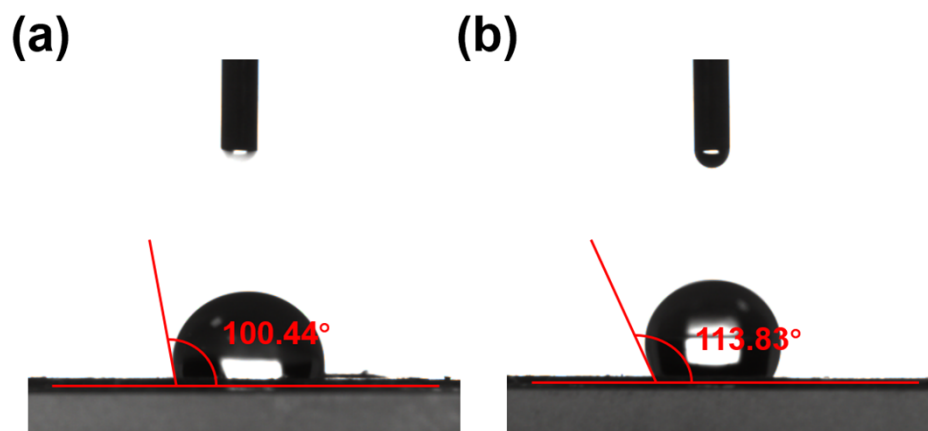

**Figure S18.** The water contact angle photos for (a) PyG-COF and (b) PyG-Im-COF.

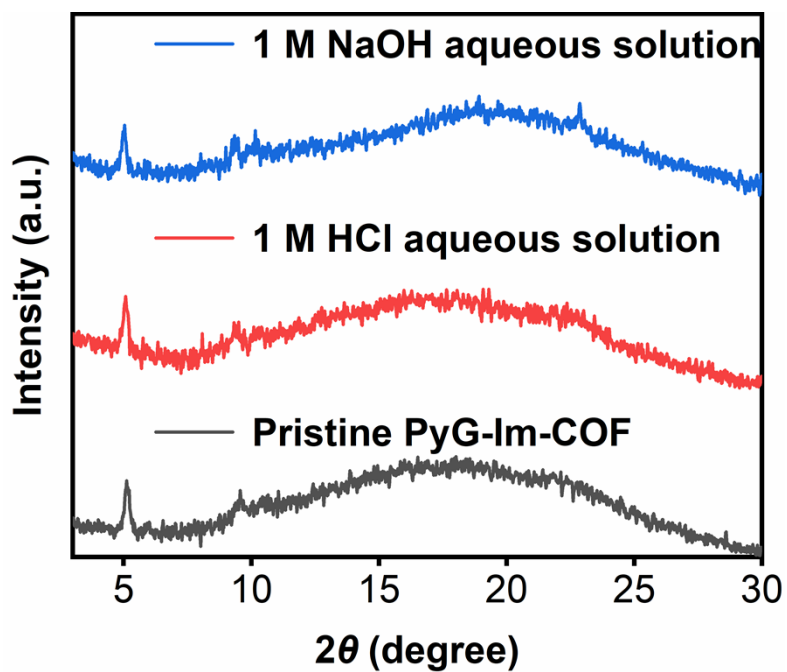

**Figure S19.** PXRD patterns of PyG-Im-COF after treated upon different conditions for 2 days.



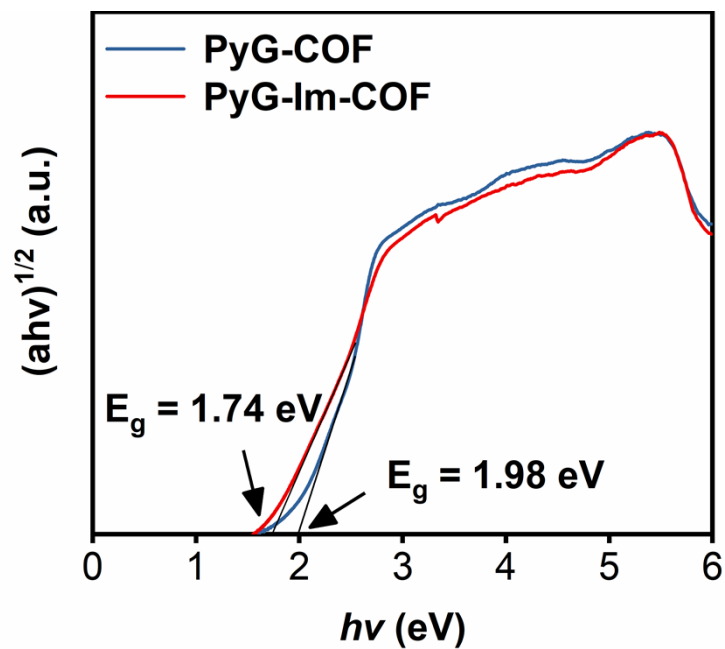

Figure S20. Tauc plots of the PyG-COF and PyG-Im-COF.

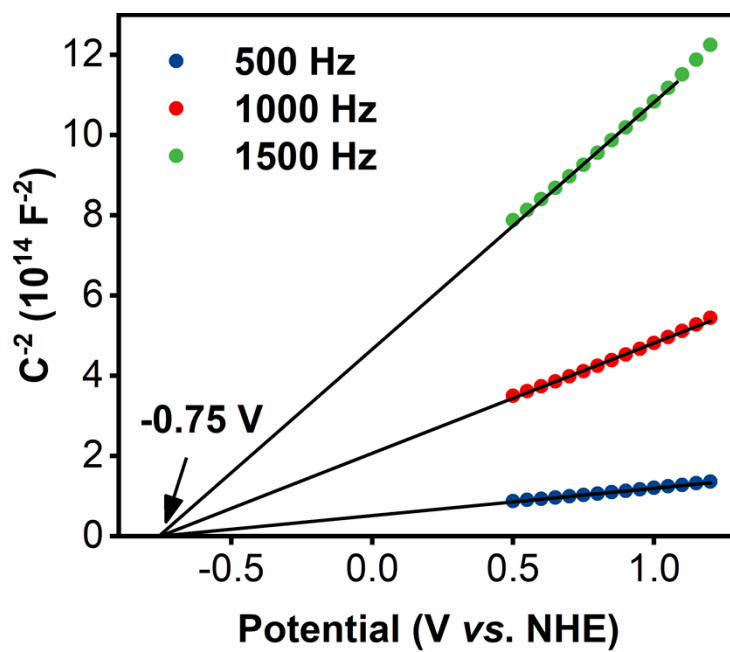

Figure S21. Mott-Schottky plots for PyG-Im-COF.

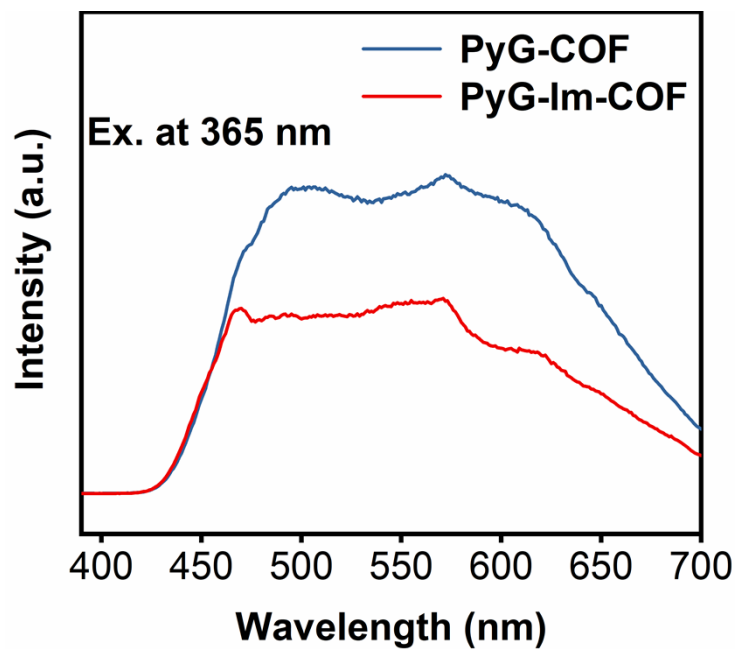

Figure S22. PL spectra of PyG-COF and PyG-Im-COF.

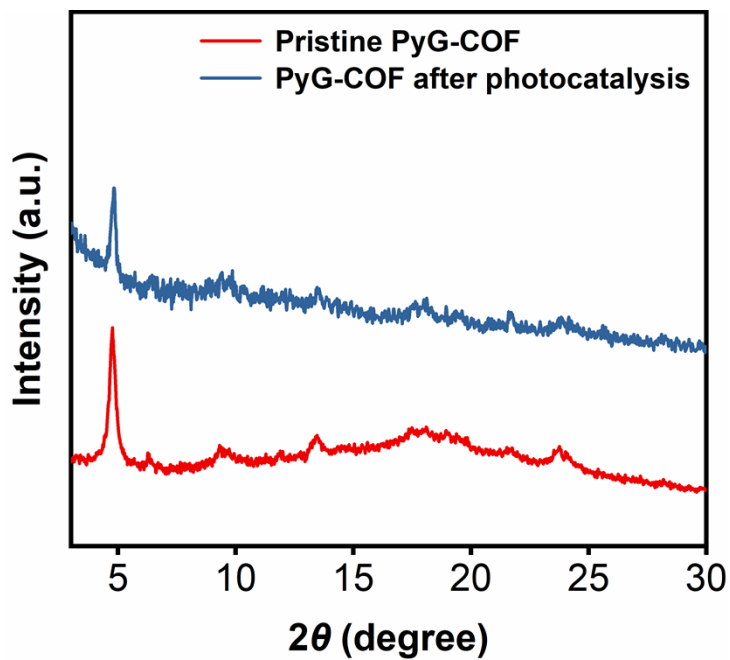

Figure S23. PXRD patterns of PyG-COF before and after photocatalysis.

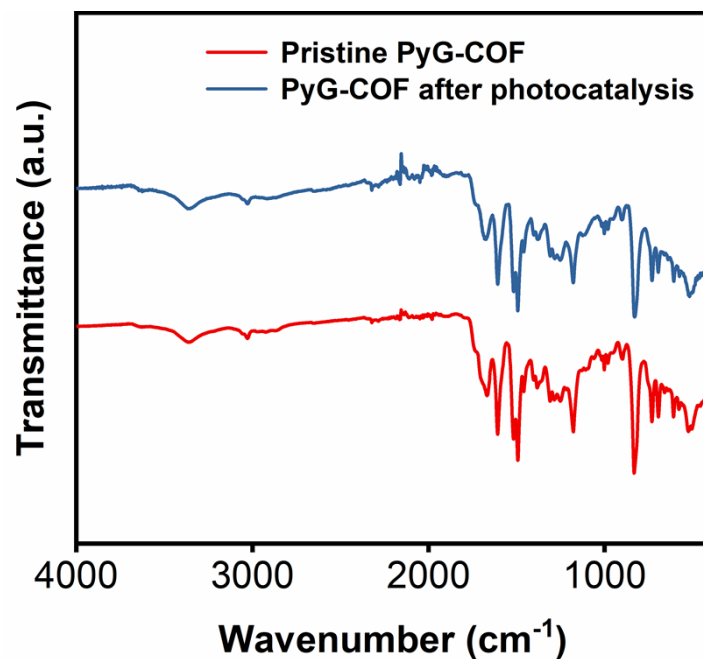

**Figure S24.** FT-IR spectra of PyG-COF before and after photocatalysis.

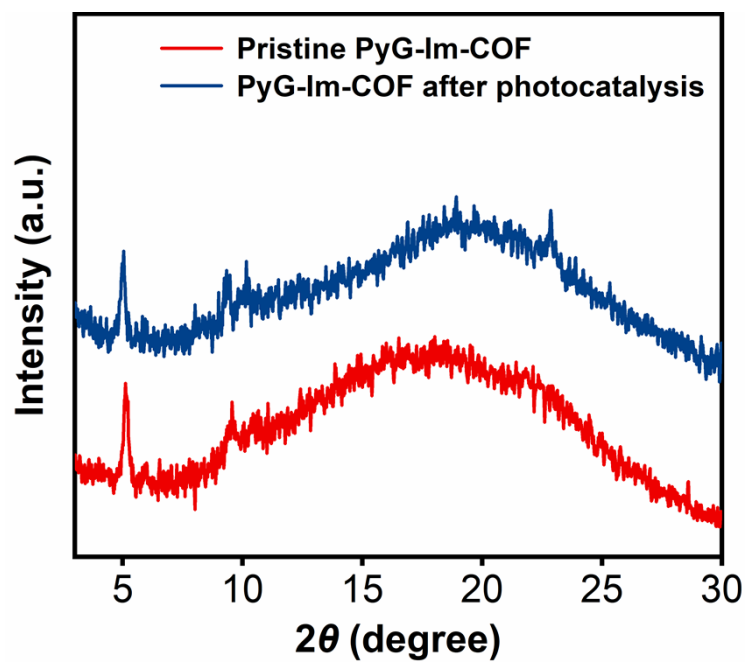

**Figure S25.** PXRD patterns of PyG-Im-COF before and after photocatalysis.

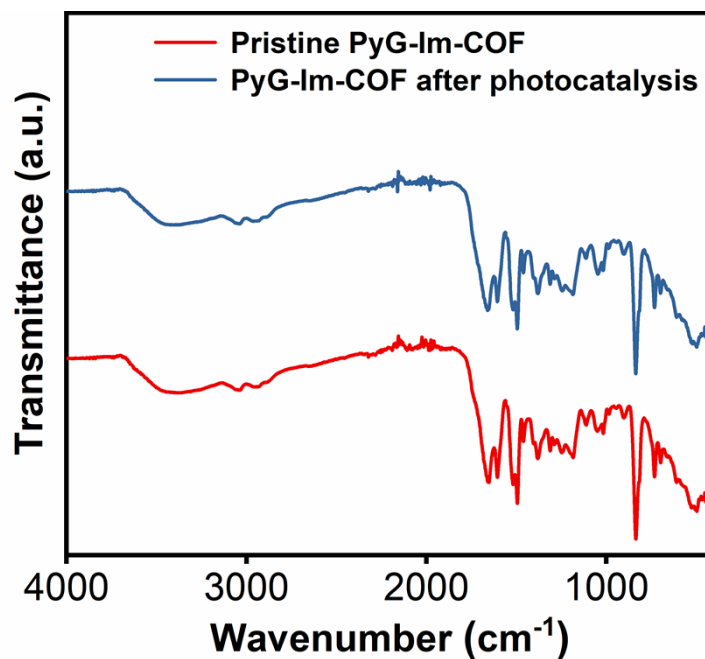

**Figure S26.** FT-IR spectra of PyG-Im-COF before and after photocatalysis.

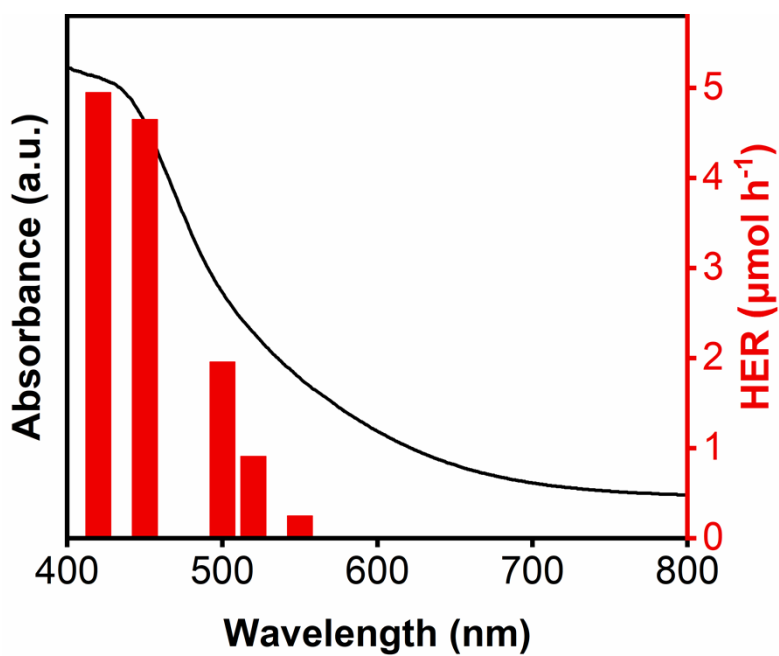

**Figure S27.** The photocatalytic  $\text{H}_2$  evolution rate of PyG-Im-COF under different wavelength monochromatic light.

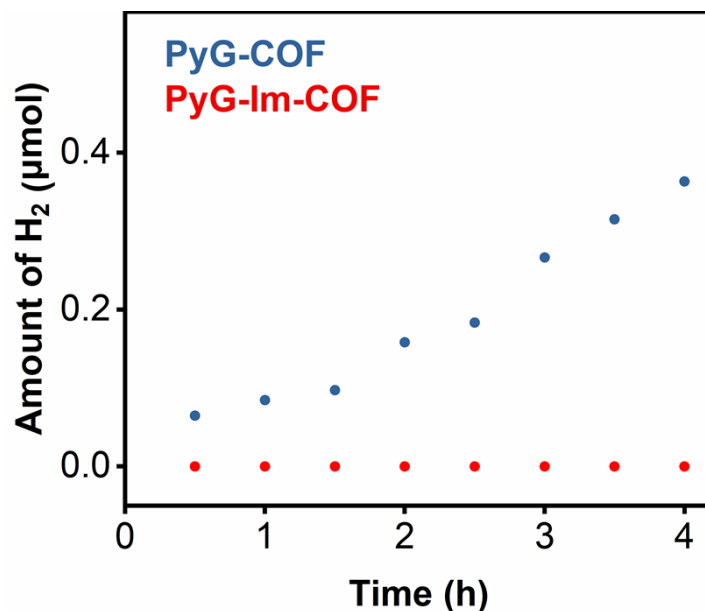

**Figure S28.** The photocatalytic H<sub>2</sub> evolution performances of PyG-COF and PyG-Im-COF with triethanolamine as the sacrificial electron donor under visible light irradiation.

**Table S1.** Fractional atomic coordinates for the structural model 1 of PyG-COF in AA stacking.

| The structural model 1 of PyG-COF in AA stacking                                                                      |         |          |         |     |          |          |         |
|-----------------------------------------------------------------------------------------------------------------------|---------|----------|---------|-----|----------|----------|---------|
| $a = 27.45 \text{ \AA}, b = 28.74 \text{ \AA}, c = 3.50 \text{ \AA}, \alpha = \beta = 90^\circ, \gamma = 88.43^\circ$ |         |          |         |     |          |          |         |
| C1                                                                                                                    | 0.11008 | 0.47058  | 0.05681 | C77 | -0.29686 | -0.35426 | 0.89357 |
| C2                                                                                                                    | 0.04848 | 0.51434  | 0.03061 | C78 | -0.33980 | -0.31429 | 0.86287 |
| C3                                                                                                                    | 0.09449 | 0.55993  | 0.05188 | C79 | -0.37380 | -0.32128 | 0.81513 |
| C4                                                                                                                    | 0.02861 | 0.60239  | 0.02517 | C80 | -0.36714 | -0.36876 | 0.79841 |
| C5                                                                                                                    | 0.21494 | 0.47227  | 0.10436 | C81 | -0.32323 | -0.4085  | 0.82916 |
| C6                                                                                                                    | 0.25367 | 0.51780  | 0.12436 | C82 | -0.21427 | -0.5352  | 0.91436 |
| C7                                                                                                                    | 0.19871 | 0.56175  | 0.09950 | C83 | -0.11000 | -0.53319 | 0.96187 |
| C8                                                                                                                    | 0.27762 | 0.42817  | 0.13502 | C84 | -0.04649 | -0.57563 | 0.98862 |
| C9                                                                                                                    | 0.24629 | 0.60777  | 0.12551 | C85 | 0.05827  | 0.42621  | 0.03502 |
| C10                                                                                                                   | 0.23172 | 0.60633  | 0.17439 | C86 | -0.26169 | -0.58128 | 0.88842 |
| C11                                                                                                                   | 0.26834 | 0.64882  | 0.19954 | C87 | -0.24302 | -0.57995 | 0.83955 |
| C12                                                                                                                   | 0.32185 | 0.69386  | 0.17620 | C88 | -0.27753 | -0.62251 | 0.81446 |
| C13                                                                                                                   | 0.34265 | 0.69562  | 0.12770 | C89 | -0.33299 | -0.66749 | 0.83783 |
| C14                                                                                                                   | 0.30726 | 0.65299  | 0.10269 | C90 | -0.35835 | -0.66912 | 0.88630 |
| C15                                                                                                                   | 0.37185 | 0.38287  | 0.11669 | C91 | -0.32503 | -0.62643 | 0.91126 |
| C16                                                                                                                   | 0.41503 | 0.34167  | 0.14557 | N92 | -0.34874 | -0.71207 | 0.81330 |
| C17                                                                                                                   | 0.36849 | 0.34496  | 0.19383 | C93 | -0.44612 | -0.24059 | 0.70851 |
| C18                                                                                                                   | 0.28476 | 0.39009  | 0.21268 | C94 | -0.44512 | -0.28350 | 0.7397  |
| C19                                                                                                                   | 0.24055 | 0.43132  | 0.18356 | N95 | -0.38723 | -0.19734 | 0.72396 |
| N20                                                                                                                   | 0.34082 | 0.73837  | 0.20080 | N96 | -0.39684 | -0.27971 | 0.78414 |
| C21                                                                                                                   | 0.33956 | 0.73976  | 0.24573 | H97 | 0.29732  | 0.62571  | 0.02713 |
| C22                                                                                                                   | 0.34117 | -0.21352 | 0.26838 | H98 | -0.21433 | 0.62387  | 0.04126 |

|     |          |          |         |      |          |          |         |
|-----|----------|----------|---------|------|----------|----------|---------|
| C23 | 0.06226  | 0.01248  | 0.48299 | H99  | 0.33360  | 0.52032  | 0.16267 |
| C24 | 0.12266  | 0.05627  | 0.45666 | H100 | 0.18948  | 0.57009  | 0.19403 |
| C25 | 0.22547  | 0.05439  | 0.40898 | H101 | 0.25482  | 0.64701  | 0.23918 |
| C26 | 0.26666  | 0.00863  | 0.38941 | H102 | 0.38869  | 0.73196  | 0.10837 |
| C27 | 0.07494  | 0.10060  | 0.47865 | H103 | 0.32860  | 0.65529  | 0.06311 |
| C28 | 0.28385  | 0.09800  | 0.37728 | H104 | 0.41428  | 0.37938  | 0.07760 |
| C29 | 0.29686  | 0.14574  | 0.39357 | H105 | 0.48848  | 0.30510  | 0.12999 |
| C30 | 0.33980  | 0.18571  | 0.36287 | H106 | 0.25227  | 0.39338  | 0.25193 |
| C31 | 0.37380  | 0.17872  | 0.31513 | H107 | 0.17359  | 0.46784  | 0.19964 |
| C32 | 0.36714  | 0.13124  | 0.29841 | H108 | 0.33719  | 0.70442  | 0.26749 |
| C33 | 0.32323  | 0.09150  | 0.32916 | H109 | 0.33577  | -0.17820 | 0.24658 |
| C34 | 0.21427  | -0.0352  | 0.41436 | H110 | 0.34709  | 0.00578  | 0.35115 |
| C35 | 0.11000  | -0.03319 | 0.46187 | H111 | 0.12120  | 0.13636  | 0.45833 |
| C36 | 0.04649  | -0.07563 | 0.48862 | H112 | 0.27222  | 0.15238  | 0.43243 |
| C37 | -0.05827 | -0.07379 | 0.53502 | H113 | 0.34716  | 0.22418  | 0.37679 |
| C38 | 0.26169  | -0.08128 | 0.38842 | H114 | 0.39770  | 0.12503  | 0.25953 |
| C39 | 0.24302  | -0.07995 | 0.33955 | H115 | 0.31954  | 0.05324  | 0.31472 |
| C40 | 0.27753  | -0.12251 | 0.31446 | H116 | 0.08061  | -0.11278 | 0.47235 |
| C41 | 0.33299  | -0.16749 | 0.33783 | H117 | -0.10407 | -0.10898 | 0.55626 |
| C42 | 0.35835  | -0.16912 | 0.38630 | H118 | 0.19915  | -0.04376 | 0.31989 |
| C43 | 0.32503  | -0.12643 | 0.41126 | H119 | 0.26069  | -0.12081 | 0.27484 |
| N44 | 0.34874  | -0.21207 | 0.31330 | H120 | 0.40644  | -0.20541 | 0.40565 |
| C45 | 0.44612  | 0.25941  | 0.20851 | H121 | 0.35004  | -0.12862 | 0.45081 |
| C46 | 0.44512  | 0.2165   | 0.23970 | H122 | 0.49948  | 0.25524  | 0.16970 |
| N47 | 0.38723  | 0.30266  | 0.22396 | H123 | 0.48740  | 0.17871  | 0.22506 |
| N48 | 0.39684  | 0.22029  | 0.28414 | H124 | -0.06162 | 0.13906  | 0.54239 |
| C49 | -0.11008 | -0.02942 | 0.55681 | H125 | -0.33360 | 0.02032  | 0.66267 |
| C50 | -0.04848 | 0.01434  | 0.53061 | H126 | -0.18948 | 0.07009  | 0.69403 |
| C51 | -0.09449 | 0.05993  | 0.55188 | H127 | -0.25482 | 0.14701  | 0.73918 |
| C52 | -0.02861 | 0.10239  | 0.52517 | H128 | -0.38869 | 0.23196  | 0.60837 |
| C53 | -0.21494 | -0.02773 | 0.60436 | H129 | -0.32860 | 0.15529  | 0.56311 |
| C54 | -0.25367 | 0.0178   | 0.62436 | H130 | -0.41428 | -0.12062 | 0.5776  |
| C55 | -0.19871 | 0.06175  | 0.59950 | H131 | -0.48848 | -0.19490 | 0.62999 |
| C56 | -0.27762 | -0.07183 | 0.63502 | H132 | -0.25227 | -0.10662 | 0.75193 |
| C57 | -0.24629 | 0.10777  | 0.62551 | H133 | -0.17359 | -0.03216 | 0.69964 |
| C58 | -0.23172 | 0.10633  | 0.67439 | H134 | -0.33719 | 0.20442  | 0.76749 |
| C59 | -0.26834 | 0.14882  | 0.69954 | H135 | -0.33577 | -0.67820 | 0.74658 |
| C60 | -0.32185 | 0.19386  | 0.67620 | H136 | -0.34709 | -0.49422 | 0.85115 |
| C61 | -0.34265 | 0.19562  | 0.62770 | H137 | -0.35296 | -0.37814 | 0.97427 |
| C62 | -0.30726 | 0.15299  | 0.60269 | H138 | 0.15890  | -0.37736 | 0.96020 |
| C63 | -0.37185 | -0.11713 | 0.61669 | H139 | -0.27222 | -0.34762 | 0.93243 |
| C64 | -0.41503 | -0.15833 | 0.64557 | H140 | -0.34716 | -0.27582 | 0.87679 |
| C65 | -0.36849 | -0.15504 | 0.69383 | H141 | -0.39770 | -0.37497 | 0.75953 |
| C66 | -0.28476 | -0.10991 | 0.71268 | H142 | -0.31954 | -0.44676 | 0.81472 |
| C67 | -0.24055 | -0.06868 | 0.68356 | H143 | 0.18125  | -0.59758 | 0.97010 |

|     |          |          |         |      |          |          |         |
|-----|----------|----------|---------|------|----------|----------|---------|
| N68 | -0.34082 | 0.23837  | 0.70080 | H144 | -0.31825 | -0.59852 | 0.98971 |
| C69 | -0.33956 | 0.23976  | 0.74573 | H145 | -0.16350 | 0.40462  | 0.05605 |
| C70 | -0.34117 | -0.71352 | 0.76838 | H146 | 0.33605  | 0.40454  | 0.03649 |
| C71 | -0.06226 | -0.48752 | 0.98299 | H147 | -0.19915 | -0.54376 | 0.81989 |
| C72 | -0.12266 | -0.44373 | 0.95666 | H148 | -0.26069 | -0.62081 | 0.77484 |
| C73 | -0.22547 | -0.44561 | 0.90898 | H149 | -0.40644 | -0.70541 | 0.90565 |
| C74 | -0.26666 | -0.49137 | 0.88941 | H150 | -0.35004 | -0.62862 | 0.95081 |
| C75 | -0.07494 | -0.39940 | 0.97865 | H151 | -0.49948 | -0.24476 | 0.6697  |
| C76 | -0.28385 | -0.40200 | 0.87728 | H152 | -0.4874  | -0.32129 | 0.72506 |

**Table S2.** Fractional atomic coordinates for the structural model 2 of PyG-COF in AA stacking.

| The structural model 2 of PyG-COF in AA stacking                                                                      |         |          |          |      |         |          |          |
|-----------------------------------------------------------------------------------------------------------------------|---------|----------|----------|------|---------|----------|----------|
| $a = 29.85 \text{ \AA}, b = 26.09 \text{ \AA}, c = 3.18 \text{ \AA}, \alpha = \beta = 90^\circ, \gamma = 90.44^\circ$ |         |          |          |      |         |          |          |
| C1                                                                                                                    | 1.40510 | -1.01823 | -0.03063 | C78  | 1.87524 | -1.67888 | 0.10067  |
| C2                                                                                                                    | 1.44993 | -1.04360 | 0.00331  | C79  | 1.89975 | -1.63763 | 0.11383  |
| C3                                                                                                                    | 1.49831 | -1.02089 | 0.00690  | C80  | 1.85096 | -1.39093 | 0.11283  |
| C4                                                                                                                    | 1.54374 | -1.04685 | 0.01350  | C81  | 1.81491 | -1.35908 | 0.03777  |
| C5                                                                                                                    | 1.59136 | -1.02504 | -0.02126 | C82  | 1.76426 | -1.3718  | -0.03106 |
| C6                                                                                                                    | 1.44724 | -1.09120 | -0.04997 | C83  | 1.75183 | -1.41705 | -0.06234 |
| C7                                                                                                                    | 1.49332 | -1.11268 | -0.11805 | C84  | 1.79057 | -1.44901 | -0.05569 |
| C8                                                                                                                    | 1.54149 | -1.09442 | -0.03022 | N85  | 1.69757 | -1.22598 | 0.00900  |
| C9                                                                                                                    | 1.40171 | -1.11926 | -0.04244 | C86  | 1.68908 | -1.26850 | -0.00215 |
| C10                                                                                                                   | 1.5833  | -1.12576 | -0.00085 | C87  | 1.7319  | -1.29712 | -0.03029 |
| C11                                                                                                                   | 1.57106 | -1.17108 | 0.08945  | N88  | 1.72426 | -1.33990 | -0.03172 |
| C12                                                                                                                   | 1.60722 | -1.20422 | 0.08064  | C89  | 1.22421 | -1.19538 | 0.02504  |
| C13                                                                                                                   | 1.65887 | -1.19320 | 0.03004  | C90  | 1.18851 | -1.23211 | 0.02701  |
| C14                                                                                                                   | 1.67343 | -1.14899 | -0.01910 | N91  | 1.27227 | -1.20553 | 0.04124  |
| C15                                                                                                                   | 1.63656 | -1.11629 | -0.06075 | N92  | 1.20796 | -1.27183 | 0.03942  |
| C16                                                                                                                   | 1.35136 | -1.10431 | -0.12627 | N93  | 1.79571 | -1.72210 | -0.00654 |
| C17                                                                                                                   | 1.30879 | -1.13073 | -0.05871 | N94  | 1.72920 | -1.78781 | -0.03461 |
| C18                                                                                                                   | 1.31469 | -1.17591 | 0.02370  | C95  | 1.77730 | -1.79838 | -0.02005 |
| C19                                                                                                                   | 1.36337 | -1.19376 | 0.06295  | C96  | 1.81407 | -1.76216 | -0.00770 |
| C20                                                                                                                   | 1.40607 | -1.16573 | 0.05151  | H97  | 1.37139 | -1.03056 | 0.13235  |
| C21                                                                                                                   | 1.10287 | -1.44290 | 0.04514  | H98  | 1.39368 | -1.02263 | -0.32294 |
| C22                                                                                                                   | 1.04860 | -1.44979 | 0.03926  | H99  | 1.60435 | -1.0332  | -0.30247 |
| C23                                                                                                                   | 1.02687 | -1.49317 | -0.00828 | H100 | 1.62300 | -1.03808 | 0.15241  |
| C24                                                                                                                   | 1.06002 | -1.53008 | -0.05644 | H101 | 1.49184 | -1.14477 | -0.26762 |
| C25                                                                                                                   | 1.11352 | -1.52456 | 0.00724  | H102 | 1.53290 | -1.18233 | 0.16609  |
| C26                                                                                                                   | 1.13231 | -1.48148 | 0.08483  | H103 | 1.59357 | -1.23809 | 0.11845  |
| C27                                                                                                                   | 1.01409 | -1.41132 | -0.00082 | H104 | 1.71364 | -1.14030 | -0.05536 |
| C28                                                                                                                   | 1.03832 | -1.57064 | -0.18229 | H105 | 1.65325 | -1.08630 | -0.17726 |
| C29                                                                                                                   | 1.13077 | -1.39739 | 0.01736  | H106 | 1.34157 | -1.07403 | -0.27663 |
| C30                                                                                                                   | 1.15217 | -1.56158 | 0.00371  | H107 | 1.27162 | -1.11583 | -0.09993 |
| C31                                                                                                                   | 1.18456 | -1.39351 | 0.08416  | H108 | 1.36819 | -1.22944 | 0.10944  |

|     |         |          |          |      |         |          |          |
|-----|---------|----------|----------|------|---------|----------|----------|
| C32 | 1.20936 | -1.35214 | 0.07701  | H109 | 1.44207 | -1.18139 | 0.12325  |
| C33 | 1.18137 | -1.31316 | 0.03112  | H110 | 1.17113 | -1.47885 | 0.17995  |
| C34 | 1.12956 | -1.31562 | -0.05243 | H111 | 1.01883 | -1.40312 | -0.29753 |
| C35 | 1.10665 | -1.35684 | -0.09921 | H112 | 1.02404 | -1.38043 | 0.16108  |
| C36 | 1.13977 | -1.60566 | 0.12148  | H113 | 1.06035 | -1.59814 | -0.28375 |
| C37 | 1.17585 | -1.63911 | 0.11452  | H114 | 1.20977 | -1.42117 | 0.13362  |
| C38 | 1.22672 | -1.62866 | 0.02019  | H115 | 1.25062 | -1.35037 | 0.11080  |
| C39 | 1.24096 | -1.58497 | -0.06906 | H116 | 1.10696 | -1.28620 | -0.11334 |
| C40 | 1.20398 | -1.55214 | -0.09572 | H117 | 1.07165 | -1.35364 | -0.25853 |
| C41 | 1.30086 | -1.73177 | -0.01349 | H118 | 1.10267 | -1.61572 | 0.22190  |
| C42 | 1.25712 | -1.70376 | -0.01748 | H119 | 1.16372 | -1.67260 | 0.19747  |
| N43 | 1.26539 | -1.66139 | 0.01547  | H120 | 1.28072 | -1.57687 | -0.13122 |
| C44 | 1.59401 | -1.97548 | 0.01572  | H121 | 1.21686 | -1.51953 | -0.19669 |
| C45 | 1.54931 | -1.94995 | -0.01620 | H122 | 1.33788 | -1.71633 | 0.03582  |
| C46 | 1.5009  | -1.97261 | -0.00940 | H123 | 1.21924 | -1.71821 | -0.05488 |
| C47 | 1.45547 | -1.94674 | -0.00377 | H124 | 1.60612 | -1.96957 | 0.30362  |
| C48 | 1.40782 | -1.96886 | 0.03345  | H125 | 1.62751 | -1.96447 | -0.15409 |
| C49 | 1.55253 | -1.90218 | 0.03290  | H126 | 1.37560 | -1.95445 | -0.13006 |
| C50 | 1.50650 | -1.88047 | 0.10909  | H127 | 1.39675 | -1.96327 | 0.32471  |
| C51 | 1.45788 | -1.89918 | 0.04458  | H128 | 1.50826 | -1.84814 | 0.25376  |
| C52 | 1.59864 | -1.87438 | 0.02030  | H129 | 1.46305 | -1.81104 | -0.16138 |
| C53 | 1.41545 | -1.86842 | 0.03032  | H130 | 1.39795 | -1.75771 | -0.16286 |
| C54 | 1.42539 | -1.82318 | -0.07856 | H131 | 1.28462 | -1.85923 | 0.09405  |
| C55 | 1.38692 | -1.79180 | -0.09470 | H132 | 1.34957 | -1.90847 | 0.26693  |
| C56 | 1.33579 | -1.80498 | -0.03900 | H133 | 1.66029 | -1.92062 | 0.22134  |
| C57 | 1.32419 | -1.84903 | 0.04828  | H134 | 1.72914 | -1.8782  | 0.06289  |
| C58 | 1.36320 | -1.87912 | 0.11624  | H135 | 1.63267 | -1.76364 | -0.09654 |
| C59 | 1.64941 | -1.88978 | 0.08682  | H136 | 1.55856 | -1.81144 | -0.12213 |
| C60 | 1.69201 | -1.86301 | 0.02916  | H137 | 1.83069 | -1.52279 | 0.21943  |
| C61 | 1.68637 | -1.81741 | -0.03192 | H138 | 1.97395 | -1.60959 | -0.28921 |
| C62 | 1.63753 | -1.79949 | -0.06368 | H139 | 1.94974 | -1.41150 | 0.34610  |
| C63 | 1.59459 | -1.82753 | -0.05901 | H140 | 1.94029 | -1.39099 | -0.11214 |
| N64 | 1.29468 | -1.77434 | -0.05024 | H141 | 1.79936 | -1.57284 | -0.18805 |
| C65 | 1.89958 | -1.55275 | 0.00525  | H142 | 1.75559 | -1.64415 | -0.14510 |
| C66 | 1.95239 | -1.54414 | -0.07011 | H143 | 1.89682 | -1.70838 | 0.17929  |
| C67 | 1.97234 | -1.50013 | -0.02777 | H144 | 1.93854 | -1.63809 | 0.21496  |
| C68 | 1.93752 | -1.46414 | -0.00363 | H145 | 1.88304 | -1.37676 | 0.26398  |
| C69 | 1.88384 | -1.47210 | 0.04307  | H146 | 1.82736 | -1.32476 | 0.07111  |
| C70 | 1.86831 | -1.51639 | 0.09752  | H147 | 1.71218 | -1.42738 | -0.09507 |
| C71 | 1.98625 | -1.57751 | -0.18723 | H148 | 1.77896 | -1.48309 | -0.11689 |
| C72 | 1.95843 | -1.41847 | 0.05198  | H149 | 1.65142 | -1.28339 | 0.00651  |
| C73 | 1.87421 | -1.59805 | 0.00200  | H150 | 1.76923 | -1.28147 | -0.04557 |
| C74 | 1.84209 | -1.43679 | 0.03461  | H151 | 1.21026 | -1.16152 | 0.00401  |
| C75 | 1.82160 | -1.60152 | -0.09637 | H152 | 1.14788 | -1.22572 | 0.01522  |
| C76 | 1.79627 | -1.6424  | -0.08065 | H153 | 1.79078 | -1.83245 | -0.01434 |



|     |         |          |         |      |         |          |          |
|-----|---------|----------|---------|------|---------|----------|----------|
| C77 | 1.82327 | -1.68119 | 0.00384 | H154 | 1.85468 | -1.76899 | -0.00603 |
|-----|---------|----------|---------|------|---------|----------|----------|

**Table S3.** Fractional atomic coordinates for the structural model 3 of PyG-COF in AA stacking.

| The structural model 3 of PyG-COF in AA stacking                                                                                      |          |         |          |      |          |         |          |
|---------------------------------------------------------------------------------------------------------------------------------------|----------|---------|----------|------|----------|---------|----------|
| $a = 26.60 \text{ \AA}, b = 29.15 \text{ \AA}, c = 3.59 \text{ \AA}, \alpha = 89.18^\circ, \beta = 90.48^\circ, \gamma = 89.68^\circ$ |          |         |          |      |          |         |          |
| C1                                                                                                                                    | -1.87332 | 2.35477 | -1.91198 | C78  | -1.02848 | 2.52136 | -0.99278 |
| C2                                                                                                                                    | -1.91719 | 2.63165 | -1.90834 | C79  | -1.10678 | 2.54861 | -1.03353 |
| C3                                                                                                                                    | -1.96380 | 2.61156 | -1.86396 | C80  | -1.18027 | 2.52189 | -1.0736  |
| C4                                                                                                                                    | -1.92017 | 2.64171 | -1.82520 | C81  | -1.17020 | 2.46975 | -1.07432 |
| C5                                                                                                                                    | -1.83193 | 2.69285 | -1.83008 | C82  | -1.04956 | 2.62607 | -0.99121 |
| C6                                                                                                                                    | -1.78671 | 2.71346 | -1.87425 | C83  | -1.11332 | 2.60187 | -1.03286 |
| C7                                                                                                                                    | -1.82931 | 2.68319 | -1.91289 | C84  | -1.13094 | 2.35758 | -1.07783 |
| C8                                                                                                                                    | -1.78499 | 2.30364 | -1.91780 | C85  | -1.96052 | 2.54737 | -1.95130 |
| C9                                                                                                                                    | -1.74054 | 2.27177 | -1.88007 | C86  | -1.97544 | 2.60052 | -1.95033 |
| C10                                                                                                                                   | -1.78389 | 2.29020 | -1.83555 | C87  | -1.94065 | 2.44065 | -1.95271 |
| C11                                                                                                                                   | -1.87351 | 2.34104 | -1.82919 | C88  | -1.86546 | 2.46742 | -1.91268 |
| C12                                                                                                                                   | -1.91872 | 2.37279 | -1.86705 | C89  | -1.87450 | 2.51954 | -1.91204 |
| C13                                                                                                                                   | -1.59703 | 2.10480 | -1.52686 | C90  | -2.00114 | 2.36313 | -1.99491 |
| C14                                                                                                                                   | -1.59883 | 2.05162 | -1.53030 | C91  | -1.93667 | 2.38735 | -1.95323 |
| C15                                                                                                                                   | -1.52572 | 2.02158 | -1.49114 | C92  | -1.68428 | 2.80077 | -1.74985 |
| C16                                                                                                                                   | -1.45729 | 2.04467 | -1.44832 | C93  | -1.72206 | 2.77093 | -1.79159 |
| C17                                                                                                                                   | -1.46932 | 2.09775 | -1.44441 | N94  | -1.79261 | 2.72302 | -1.78983 |
| C18                                                                                                                                   | -1.53567 | 2.12618 | -1.48388 | C95  | -1.36356 | 2.18834 | -1.23599 |
| C19                                                                                                                                   | -1.67491 | 2.02769 | -1.57176 | C96  | -1.32566 | 2.21816 | -1.19426 |
| C20                                                                                                                                   | -1.37475 | 2.01404 | -1.41070 | H97  | -2.03836 | 2.57008 | -1.85910 |
| C21                                                                                                                                   | -1.65385 | 2.14001 | -1.56635 | H98  | -1.95651 | 2.62464 | -1.78943 |
| C22                                                                                                                                   | -1.42311 | 2.12557 | -1.40033 | H99  | -1.71490 | 2.75507 | -1.87873 |
| C23                                                                                                                                   | -1.74358 | 2.19076 | -1.55819 | H100 | -1.79196 | 2.70074 | -1.94845 |
| C24                                                                                                                                   | -1.78137 | 2.22489 | -1.59448 | H101 | -1.74859 | 2.28764 | -1.95378 |
| C25                                                                                                                                   | -1.72920 | 2.20906 | -1.63969 | H102 | -1.66857 | 2.23053 | -1.88554 |
| C26                                                                                                                                   | -1.63979 | 2.15856 | -1.64818 | H103 | -1.90968 | 2.35657 | -1.79304 |
| C27                                                                                                                                   | -1.60113 | 2.12466 | -1.61188 | H104 | -1.99353 | 2.41385 | -1.86106 |
| C28                                                                                                                                   | -1.47742 | 2.10177 | -1.35774 | H105 | -1.53833 | 2.16878 | -1.47983 |
| C29                                                                                                                                   | -1.44487 | 2.12846 | -1.31690 | H106 | -1.74270 | 2.05095 | -1.60351 |
| C30                                                                                                                                   | -1.35991 | 2.18008 | -1.31777 | H107 | -1.58143 | 2.02393 | -1.38191 |
| C31                                                                                                                                   | -1.30777 | 2.20435 | -1.35999 | H108 | -1.07952 | 2.02330 | -1.39817 |
| C32                                                                                                                                   | -1.33939 | 2.17739 | -1.40086 | H109 | -1.78656 | 2.20456 | -1.52155 |
| N33                                                                                                                                   | -1.73949 | 2.25638 | -1.79765 | H110 | -1.85493 | 2.26574 | -1.58717 |
| C34                                                                                                                                   | -1.77287 | 2.26987 | -1.75524 | H111 | -1.59830 | 2.14503 | -1.68493 |
| C35                                                                                                                                   | -1.72732 | 2.23251 | -1.71900 | H112 | -1.52557 | 2.08399 | -1.61967 |
| N36                                                                                                                                   | -1.76864 | 2.24472 | -1.67637 | H113 | -1.54945 | 2.05994 | -1.35607 |
| N37                                                                                                                                   | -1.32433 | 2.20848 | -1.27636 | H114 | -1.48736 | 2.10834 | -1.28256 |
| C38                                                                                                                                   | -1.17811 | 2.63462 | -1.07389 | H115 | -1.23915 | 2.24629 | -1.36127 |
| C39                                                                                                                                   | -1.08318 | 2.37757 | -1.12220 | H116 | -1.29622 | 2.19803 | -1.43494 |

|     |          |         |          |      |          |         |          |
|-----|----------|---------|----------|------|----------|---------|----------|
| C40 | -1.12477 | 2.34727 | -1.16084 | H117 | -1.83733 | 2.31065 | -1.74648 |
| C41 | -1.21292 | 2.29616 | -1.15589 | H118 | -1.65457 | 2.19208 | -1.72813 |
| C42 | -1.25913 | 2.27563 | -1.11171 | H119 | -1.00940 | 2.41907 | -1.12711 |
| C43 | -1.21852 | 2.30605 | -1.07320 | H120 | -1.08683 | 2.36418 | -1.19665 |
| C44 | -1.26361 | 2.68580 | -1.06779 | H121 | -1.33004 | 2.23400 | -1.10719 |
| C45 | -1.30645 | 2.71791 | -1.10539 | H122 | -1.25631 | 2.28925 | -1.03735 |
| C46 | -1.26429 | 2.69972 | -1.15000 | H123 | -1.29892 | 2.7016  | -1.03172 |
| C47 | -1.17956 | 2.64876 | -1.15658 | H124 | -1.37619 | 2.7592  | -1.09975 |
| C48 | -1.13629 | 2.61674 | -1.11888 | H125 | -1.14576 | 2.63334 | -1.1928  |
| N49 | -1.25114 | 2.26590 | -1.19610 | H126 | -1.06603 | 2.57557 | -1.12507 |
| C50 | -1.45581 | 2.88495 | -1.45896 | H127 | -1.51576 | 2.82099 | -1.50602 |
| C51 | -1.45140 | 2.93815 | -1.45559 | H128 | -1.08356 | 2.94875 | -1.40292 |
| C52 | -1.52237 | 2.96822 | -1.49479 | H129 | -1.58592 | 2.94941 | -1.38689 |
| C53 | -1.58928 | 2.94513 | -1.53765 | H130 | -1.73372 | 2.95801 | -1.60994 |
| C54 | -1.57799 | 2.89207 | -1.54159 | H131 | -1.28110 | 2.78474 | -1.46397 |
| C55 | -1.51590 | 2.86360 | -1.50200 | H132 | -1.20699 | 2.72400 | -1.39811 |
| C56 | -1.37237 | 2.96205 | -1.41427 | H133 | -1.44368 | 2.84551 | -1.30053 |
| C57 | -1.67004 | 2.97570 | -1.57534 | H134 | -1.52098 | 2.90625 | -1.36603 |
| C58 | -1.40226 | 2.84976 | -1.41934 | H135 | -1.48457 | 2.92930 | -1.63012 |
| C59 | -1.62271 | 2.86417 | -1.58569 | H136 | -1.54710 | 2.88052 | -1.70352 |
| C60 | -1.31738 | 2.79889 | -1.42734 | H137 | -1.81837 | 2.74353 | -1.62440 |
| C61 | -1.27623 | 2.76501 | -1.39092 | H138 | -1.76004 | 2.79206 | -1.55094 |
| C62 | -1.31967 | 2.78122 | -1.34569 | H139 | -1.20072 | 2.68003 | -1.23907 |
| C63 | -1.40668 | 2.83177 | -1.33728 | H140 | -1.37692 | 2.79882 | -1.25703 |
| C64 | -1.44838 | 2.86546 | -1.37375 | H141 | -1.34241 | 2.51973 | -0.98399 |
| C65 | -1.56220 | 2.88765 | -1.62835 | H142 | -1.25016 | 2.54292 | -1.10654 |
| C66 | -1.59549 | 2.86075 | -1.66911 | H143 | -1.23258 | 2.44963 | -1.10783 |
| C67 | -1.68853 | 2.80928 | -1.66812 | H144 | -1.30321 | 2.65106 | -0.98425 |
| C68 | -1.74522 | 2.78533 | -1.62582 | H145 | -0.79320 | 2.65196 | -0.99493 |
| C69 | -1.71258 | 2.81247 | -1.58505 | H146 | -2.27325 | 2.54503 | -1.94197 |
| N70 | -1.30467 | 2.73391 | -1.18776 | H147 | -1.66046 | 2.60266 | -1.95842 |
| C71 | -1.26750 | 2.72071 | -1.23018 | H148 | -1.79507 | 2.44641 | -1.87974 |
| C72 | -1.31167 | 2.75820 | -1.26630 | H149 | -1.80993 | 2.53966 | -1.87860 |
| N73 | -1.27731 | 2.74572 | -1.30897 | H150 | -1.99657 | 2.32033 | -1.99667 |
| N74 | -1.72450 | 2.78072 | -1.70945 | H151 | -1.61781 | 2.84262 | -1.75350 |
| C75 | -1.01792 | 2.46790 | -0.99351 | H152 | -1.68942 | 2.78974 | -1.82668 |
| C76 | -1.0857  | 2.44193 | -1.03502 | H153 | -1.42916 | 2.14646 | -1.23239 |
| C77 | -1.07314 | 2.38872 | -1.03589 | H154 | -1.36314 | 2.19853 | -1.15961 |

**Table S4.** Fractional atomic coordinates for the structural model 4 of PyG-COF in AA stacking.

| The structural model 4 of PyG-COF in AA stacking                                                                                  |         |          |         |     |         |          |         |
|-----------------------------------------------------------------------------------------------------------------------------------|---------|----------|---------|-----|---------|----------|---------|
| $a = 24.75 \text{ \AA}$ , $b = 27.53 \text{ \AA}$ , $c = 3.77 \text{ \AA}$ , $\alpha = \gamma = 90^\circ$ , $\beta = 92.56^\circ$ |         |          |         |     |         |          |         |
| C1                                                                                                                                | 1.58751 | -0.98285 | 3.81132 | C21 | 1.92399 | -0.68938 | 5.08578 |
| C2                                                                                                                                | 1.54461 | -0.95652 | 3.65493 | N22 | 1.79277 | -0.73082 | 4.66131 |

|     |         |          |         |     |         |          |         |
|-----|---------|----------|---------|-----|---------|----------|---------|
| C3  | 1.54473 | -0.90530 | 3.65468 | H23 | 1.62347 | -0.96294 | 3.94116 |
| C4  | 1.58941 | -0.87507 | 3.81609 | H24 | 1.46190 | -0.81017 | 3.14714 |
| C5  | 1.42021 | -0.82665 | 3.09284 | H25 | 1.38779 | -0.75896 | 2.86321 |
| C6  | 1.37921 | -0.79811 | 2.93550 | H26 | 1.27549 | -0.88131 | 2.91130 |
| C7  | 1.32776 | -0.81743 | 2.86665 | H27 | 1.34898 | -0.93241 | 3.19753 |
| C8  | 1.31751 | -0.86538 | 2.96255 | H28 | 1.77018 | -0.84396 | 4.31998 |
| C9  | 1.35843 | -0.89362 | 3.12011 | H29 | 1.84423 | -0.79043 | 4.63263 |
| C10 | 1.76089 | -0.80487 | 4.39007 | H30 | 1.87655 | -0.55269 | 5.05595 |
| C11 | 1.80227 | -0.77500 | 4.56963 | H31 | 1.84919 | -0.58486 | 5.15125 |
| N12 | 1.71318 | -0.78822 | 4.30622 | H32 | 1.77867 | -0.63869 | 4.85488 |
| C13 | 1.95549 | -0.55915 | 5.34261 | H33 | 1.89532 | -0.75816 | 4.85723 |
| C14 | 1.95569 | -0.61028 | 5.33957 | H34 | 1.96582 | -0.70479 | 5.15359 |
| C15 | 1.91252 | -0.53294 | 5.18725 | C35 | 1.50000 | -0.98210 | 3.50000 |
| C16 | 1.91240 | -0.64107 | 5.16758 | C36 | 1.50000 | -0.88124 | 3.50000 |
| C17 | 1.86011 | -0.62371 | 5.08463 | H37 | 1.50000 | -0.84008 | 3.50000 |
| C18 | 1.82085 | -0.65346 | 4.92036 | C38 | 1.00000 | -0.53354 | 1.50000 |
| C19 | 1.83315 | -0.70123 | 4.83622 | C39 | 1.00000 | -0.63413 | 1.50000 |
| C20 | 1.88501 | -0.71911 | 4.92195 | H40 | 1.00000 | -0.67528 | 1.50000 |

**Table S5.** Fractional atomic coordinates for the structural model 5 of PyG-COF in AA stacking.

| The structural model 5 of PyG-COF in AA stacking                                      |         |          |          |     |         |          |          |
|---------------------------------------------------------------------------------------|---------|----------|----------|-----|---------|----------|----------|
| $a = b = 28.06 \text{ \AA}, c = 3.39 \text{ \AA}, \alpha = \beta = \gamma = 90^\circ$ |         |          |          |     |         |          |          |
| C1                                                                                    | 1.40478 | -1.02970 | -0.10069 | C78 | 1.88059 | -1.6896  | -0.06602 |
| C2                                                                                    | 1.44975 | -1.05717 | 0.01394  | C79 | 1.90517 | -1.64138 | 0.00471  |
| C3                                                                                    | 1.49785 | -1.03083 | 0.05940  | C80 | 1.90006 | -1.35535 | -0.09598 |
| C4                                                                                    | 1.54298 | -1.05752 | 0.16154  | C81 | 1.87290 | -1.30843 | -0.03390 |
| C5                                                                                    | 1.59126 | -1.03043 | 0.15411  | C82 | 1.82447 | -1.30897 | 0.17837  |
| C6                                                                                    | 1.44618 | -1.11024 | 0.11801  | C83 | 1.80315 | -1.35583 | 0.33136  |
| C7                                                                                    | 1.49148 | -1.1373  | 0.23162  | C84 | 1.82935 | -1.40283 | 0.25594  |
| C8                                                                                    | 1.53962 | -1.11129 | 0.23652  | C85 | 1.78479 | -1.81115 | 0.16140  |
| C9                                                                                    | 1.39802 | -1.13651 | 0.11909  | C86 | 1.82123 | -1.78172 | -0.07037 |
| C10                                                                                   | 1.58450 | -1.14079 | 0.25896  | N87 | 1.73752 | -1.78789 | 0.24828  |
| C11                                                                                   | 1.58015 | -1.19483 | 0.20342  | N88 | 1.80321 | -1.73710 | -0.26713 |
| C12                                                                                   | 1.62386 | -1.22254 | 0.06754  | C89 | 1.18968 | -1.78530 | 0.21921  |
| C13                                                                                   | 1.67215 | -1.19600 | -0.10250 | C90 | 1.22172 | -1.80910 | -0.08960 |
| C14                                                                                   | 1.67696 | -1.14375 | 0.13898  | N91 | 1.20731 | -1.74023 | 0.41166  |
| C15                                                                                   | 1.63319 | -1.11604 | 0.27301  | N92 | 1.26694 | -1.78391 | -0.20841 |
| C16                                                                                   | 1.35214 | -1.11187 | -0.02614 | C93 | 1.80477 | -1.22393 | -0.07485 |
| C17                                                                                   | 1.30390 | -1.13739 | 0.01237  | C94 | 1.76157 | -1.20165 | -0.27885 |
| C18                                                                                   | 1.30174 | -1.18795 | 0.18554  | N95 | 1.79540 | -1.26439 | 0.20497  |
| C19                                                                                   | 1.34771 | -1.21350 | 0.31367  | N96 | 1.71390 | -1.22573 | -0.22617 |
| C20                                                                                   | 1.39593 | -1.18788 | 0.27719  | H97 | 1.37329 | -1.04206 | 0.08541  |
| C21                                                                                   | 1.11935 | -1.45435 | 0.00330  | H98 | 1.39685 | -1.03384 | -0.42907 |
| C22                                                                                   | 1.06464 | -1.45483 | 0.03100  | H99 | 1.61700 | -1.05124 | -0.04109 |

|     |         |          |          |      |         |          |          |
|-----|---------|----------|----------|------|---------|----------|----------|
| C23 | 1.03778 | -1.50174 | -0.02636 | H100 | 1.60621 | -1.02998 | 0.46711  |
| C24 | 1.06443 | -1.54936 | -0.04129 | H101 | 1.48972 | -1.17705 | 0.29999  |
| C25 | 1.11925 | -1.54950 | -0.01968 | H102 | 1.54416 | -1.21331 | 0.23516  |
| C26 | 1.14682 | -1.50191 | -0.01510 | H103 | 1.62157 | -1.26241 | 0.00539  |
| C27 | 1.03593 | -1.40873 | 0.10500  | H104 | 1.71355 | -1.12611 | 0.13177  |
| C28 | 1.03577 | -1.59635 | -0.04544 | H105 | 1.63638 | -1.07710 | 0.36378  |
| C29 | 1.14585 | -1.40656 | -0.03063 | H106 | 1.35375 | -1.07496 | -0.16422 |
| C30 | 1.14587 | -1.59698 | 0.02867  | H107 | 1.26986 | -1.11903 | -0.09074 |
| C31 | 1.19388 | -1.40414 | -0.24876 | H108 | 1.34603 | -1.25139 | 0.43430  |
| C32 | 1.21351 | -1.35544 | -0.38001 | H109 | 1.43005 | -1.20665 | 0.37333  |
| C33 | 1.18622 | -1.30957 | -0.27363 | H110 | 1.18744 | -1.50193 | -0.02055 |
| C34 | 1.14244 | -1.31186 | -0.00204 | H111 | 1.05726 | -1.37598 | 0.01658  |
| C35 | 1.12223 | -1.36052 | 0.11972  | H112 | 1.02762 | -1.40705 | 0.43422  |
| C36 | 1.12267 | -1.64355 | -0.11415 | H113 | 1.05492 | -1.63206 | -0.04179 |
| C37 | 1.14410 | -1.69170 | 0.00658  | H114 | 1.21340 | -1.43832 | -0.33223 |
| C38 | 1.18859 | -1.69303 | 0.27063  | H115 | 1.24769 | -1.35337 | -0.56117 |
| C39 | 1.21453 | -1.64654 | 0.38077  | H116 | 1.12425 | -1.27765 | 0.09921  |
| C40 | 1.19377 | -1.59833 | 0.24941  | H117 | 1.08894 | -1.36249 | 0.31189  |
| C41 | 1.21045 | -1.19017 | 0.04810  | H118 | 1.08924 | -1.64235 | -0.30495 |
| C42 | 1.18172 | -1.21689 | -0.26693 | H119 | 1.12655 | -1.72632 | -0.09291 |
| N43 | 1.25478 | -1.21359 | 0.20744  | H120 | 1.24880 | -1.64783 | 0.56121  |
| N44 | 1.2024  | -1.26222 | -0.43314 | H121 | 1.21254 | -1.56372 | 0.33232  |
| C45 | 1.59739 | -1.97416 | -0.07617 | H122 | 1.19963 | -1.15288 | 0.14742  |
| C46 | 1.55007 | -1.94655 | -0.06231 | H123 | 1.14627 | -1.20231 | -0.37871 |
| C47 | 1.50270 | -1.97362 | -0.02833 | H124 | 1.62244 | -1.95941 | 0.15893  |
| C48 | 1.45533 | -1.94618 | -0.01702 | H125 | 1.61438 | -1.96924 | -0.37924 |
| C49 | 1.40804 | -1.97349 | 0.01775  | H126 | 1.38354 | -1.96246 | -0.23473 |
| C50 | 1.55021 | -1.89181 | -0.05369 | H127 | 1.39035 | -1.96400 | 0.31048  |
| C51 | 1.50279 | -1.86422 | -0.06259 | H128 | 1.5029  | -1.82361 | -0.07226 |
| C52 | 1.45525 | -1.89156 | -0.05447 | H129 | 1.44348 | -1.79198 | -0.25497 |
| C53 | 1.59755 | -1.86476 | -0.01145 | H130 | 1.36086 | -1.74526 | -0.34912 |
| C54 | 1.40786 | -1.86428 | -0.09004 | H131 | 1.27764 | -1.88234 | -0.01683 |
| C55 | 1.40820 | -1.81124 | -0.20564 | H132 | 1.35953 | -1.92875 | 0.08003  |
| C56 | 1.36079 | -1.78446 | -0.26085 | H133 | 1.64612 | -1.92904 | -0.18215 |
| C57 | 1.31330 | -1.81056 | -0.19039 | H134 | 1.72785 | -1.88466 | -0.01610 |
| C58 | 1.31292 | -1.86331 | -0.07205 | H135 | 1.64375 | -1.74778 | 0.30744  |
| C59 | 1.36011 | -1.89008 | -0.01899 | H136 | 1.56163 | -1.79225 | 0.14073  |
| C60 | 1.64540 | -1.89090 | -0.06847 | H137 | 1.83503 | -1.49451 | 0.07535  |
| C61 | 1.69244 | -1.86534 | 0.02441  | H138 | 1.95965 | -1.62968 | -0.03905 |
| C62 | 1.69158 | -1.81350 | 0.16843  | H139 | 1.96830 | -1.37395 | -0.02162 |
| C63 | 1.64403 | -1.78657 | 0.20737  | H140 | 1.99669 | -1.40359 | -0.45372 |
| C64 | 1.59695 | -1.81200 | 0.11048  | H141 | 1.80861 | -1.56156 | -0.33793 |
| C65 | 1.90040 | -1.54447 | -0.00405 | H142 | 1.76633 | -1.64557 | -0.47177 |
| C66 | 1.95487 | -1.54681 | -0.03338 | H143 | 1.89978 | -1.72423 | 0.00978  |
| C67 | 1.98358 | -1.50047 | -0.04424 | H144 | 1.94288 | -1.64008 | 0.12966  |

|     |         |          |          |      |         |          |          |
|-----|---------|----------|----------|------|---------|----------|----------|
| C68 | 1.95844 | -1.45215 | -0.06376 | H145 | 1.93560 | -1.35535 | -0.25846 |
| C69 | 1.90423 | -1.44988 | -0.00051 | H146 | 1.88828 | -1.27347 | -0.14865 |
| C70 | 1.87527 | -1.49614 | 0.03098  | H147 | 1.76732 | -1.35582 | 0.49009  |
| C71 | 1.98089 | -1.59504 | -0.04123 | H148 | 1.81305 | -1.43798 | 0.35737  |
| C72 | 1.98851 | -1.40680 | -0.12502 | H149 | 1.79287 | -1.84913 | 0.26051  |
| C73 | 1.87104 | -1.59032 | 0.00001  | H150 | 1.86024 | -1.79282 | -0.09006 |
| C74 | 1.87815 | -1.4024  | 0.05062  | H151 | 1.15376 | -1.80138 | 0.30276  |
| C75 | 1.82802 | -1.59618 | -0.26592 | H152 | 1.21277 | -1.84589 | -0.21181 |
| C76 | 1.80383 | -1.64432 | -0.34279 | H153 | 1.84256 | -1.21134 | -0.14128 |
| C77 | 1.82967 | -1.69082 | -0.23371 | H154 | 1.76501 | -1.16719 | -0.45500 |

**Table S6.** Fractional atomic coordinates for the structural model 6 of PyG-COF in AA stacking.

| The structural model 6 of PyG-COF in AA stacking                                                                      |          |         |          |      |          |         |          |
|-----------------------------------------------------------------------------------------------------------------------|----------|---------|----------|------|----------|---------|----------|
| $a = 23.23 \text{ \AA}, b = 30.83 \text{ \AA}, c = 3.74 \text{ \AA}, \alpha = \beta = 90^\circ, \gamma = 86.19^\circ$ |          |         |          |      |          |         |          |
| C1                                                                                                                    | 0.21130  | 0.40881 | -0.97745 | C78  | 0.57323  | 0.55304 | -0.04547 |
| C2                                                                                                                    | 0.37872  | 0.45497 | -0.95171 | C79  | 0.59258  | 0.55235 | -0.09134 |
| C3                                                                                                                    | 0.50841  | 0.50200 | -0.97442 | C80  | 0.50840  | 0.50200 | -0.11290 |
| C4                                                                                                                    | 0.63810  | 0.54903 | -0.95171 | C81  | 0.41371  | 0.39657 | -0.01955 |
| C5                                                                                                                    | 0.80553  | 0.59519 | -0.97745 | C82  | 0.60311  | 0.60743 | -0.01955 |
| C6                                                                                                                    | 0.38487  | 0.45431 | -0.90586 | C83  | 0.31329  | 0.40255 | -0.11850 |
| C7                                                                                                                    | 0.50841  | 0.50200 | -0.88418 | C84  | 0.70352  | 0.60145 | -0.11850 |
| C8                                                                                                                    | 0.63195  | 0.54969 | -0.90586 | C85  | 0.22755  | 0.41208 | -0.16244 |
| C9                                                                                                                    | 0.26043  | 0.40620 | -0.87899 | C86  | 0.11195  | 0.36782 | -0.18842 |
| C10                                                                                                                   | 0.75636  | 0.59779 | -0.87899 | C87  | 0.07930  | 0.31268 | -0.17095 |
| C11                                                                                                                   | 0.85987  | 0.58743 | -0.83574 | C88  | 0.16676  | 0.30252 | -0.12748 |
| C12                                                                                                                   | 0.97286  | 0.63186 | -0.80973 | C89  | 0.28177  | 0.34703 | -0.10157 |
| C13                                                                                                                   | 0.98319  | 0.68787 | -0.82647 | C90  | 0.73503  | 0.65697 | -0.10157 |
| C14                                                                                                                   | 0.87643  | 0.69875 | -0.86926 | C91  | 0.85005  | 0.70148 | -0.12747 |
| C15                                                                                                                   | 0.76331  | 0.65416 | -0.89522 | C92  | 0.93750  | 0.69132 | -0.17095 |
| C16                                                                                                                   | 0.25351  | 0.34984 | -0.89522 | C93  | 0.90484  | 0.63618 | -0.18842 |
| C17                                                                                                                   | 0.14039  | 0.30525 | -0.86926 | C94  | 0.78922  | 0.59191 | -0.16244 |
| C18                                                                                                                   | 0.03363  | 0.31613 | -0.82647 | N95  | -0.04553 | 0.26666 | -0.19650 |
| C19                                                                                                                   | 0.04396  | 0.37214 | -0.80973 | N96  | 1.06233  | 0.73734 | -0.1965  |
| C20                                                                                                                   | 0.15695  | 0.41657 | -0.83574 | H97  | -0.07803 | 0.42356 | -0.98521 |
| N21                                                                                                                   | -0.08386 | 0.26973 | -0.80072 | H98  | 0.21647  | 0.36740 | -0.95756 |
| N22                                                                                                                   | 1.10065  | 0.73426 | -0.80072 | H99  | 1.09486  | 0.58044 | -0.98521 |
| C23                                                                                                                   | -0.19407 | 0.27658 | -0.76117 | H100 | 0.80036  | 0.6366  | -0.95756 |
| C24                                                                                                                   | -0.30948 | 0.22755 | -0.73673 | H101 | 0.51132  | 0.50312 | -0.84722 |
| C25                                                                                                                   | 1.21089  | 0.72742 | -0.76117 | H102 | 0.85215  | 0.54225 | -0.82149 |
| C26                                                                                                                   | 1.32630  | 0.77645 | -0.73673 | H103 | 1.05721  | 0.62272 | -0.77474 |
| C27                                                                                                                   | -0.87592 | 0.05026 | -0.54460 | H104 | 0.88137  | 0.74417 | -0.88314 |
| C28                                                                                                                   | -0.87691 | 0.05035 | -0.59054 | H105 | 0.67593  | 0.66402 | -0.93000 |
| C29                                                                                                                   | -0.99159 | 0.00200 | -0.61208 | H106 | 0.34091  | 0.33998 | -0.93000 |
| C30                                                                                                                   | -0.87450 | 0.05017 | -0.45244 | H107 | 0.13494  | 0.25975 | -0.88298 |

|     |          |         |          |      |          |         |          |
|-----|----------|---------|----------|------|----------|---------|----------|
| C31 | -0.75583 | 0.09658 | -0.47603 | H108 | -0.04016 | 0.38147 | -0.77476 |
| C32 | -0.75663 | 0.09665 | -0.52104 | H109 | 0.16470  | 0.46175 | -0.82149 |
| C33 | -0.99160 | 0.00200 | -0.38496 | H110 | -0.20081 | 0.32105 | -0.74545 |
| C34 | -0.87366 | 0.05015 | -0.40648 | H111 | -0.30211 | 0.18304 | -0.75240 |
| C35 | -0.75817 | 0.09861 | -0.61791 | H112 | 1.21767  | 0.68296 | -0.74544 |
| C36 | -0.74864 | 0.09796 | -0.37908 | H113 | 1.31894  | 0.82096 | -0.7524  |
| C37 | -0.75652 | 0.15535 | -0.60228 | H114 | -1.16023 | 0.07108 | -0.54428 |
| C38 | -0.64608 | 0.19976 | -0.62860 | H115 | -0.99458 | 0.00074 | -0.64904 |
| C39 | -0.53656 | 0.18837 | -0.67121 | H116 | -0.65564 | 0.13545 | -0.45831 |
| C40 | -0.54136 | 0.13202 | -0.68741 | H117 | -0.65737 | 0.13557 | -0.53879 |
| C41 | -0.65163 | 0.08775 | -0.66102 | H118 | -0.99476 | 0.00071 | -0.34800 |
| C42 | -0.64612 | 0.08686 | -0.33585 | H119 | -0.84617 | 0.16570 | -0.56765 |
| C43 | -0.52750 | 0.13058 | -0.30953 | H120 | -0.64509 | 0.24554 | -0.61532 |
| C44 | -0.50988 | 0.18663 | -0.32593 | H121 | -0.45499 | 0.12227 | -0.72224 |
| C45 | -0.61564 | 0.19830 | -0.36863 | H122 | -0.65459 | 0.04228 | -0.67485 |
| C46 | -0.73431 | 0.15445 | -0.39487 | H123 | -0.65927 | 0.04164 | -0.32185 |
| N47 | -0.42030 | 0.23459 | -0.69723 | H124 | -0.44456 | 0.12079 | -0.27459 |
| N48 | -0.38413 | 0.23225 | -0.30005 | H125 | -0.60534 | 0.24379 | -0.38222 |
| C49 | -0.27532 | 0.22496 | -0.26048 | H126 | -0.82031 | 0.16507 | -0.42959 |
| C50 | -0.15031 | 0.27349 | -0.23627 | H127 | -0.27757 | 0.18062 | -0.24468 |
| C51 | 1.89372  | 0.95365 | -0.59054 | H128 | -0.14458 | 0.31761 | -0.25234 |
| C52 | 1.89273  | 0.95374 | -0.54460 | H129 | 2.29397  | 0.98168 | -0.5216  |
| C53 | 2.00841  | 1.00200 | -0.52160 | H130 | 1.67418  | 0.86843 | -0.53879 |
| C54 | 1.77344  | 0.90735 | -0.52104 | H131 | 1.67377  | 0.86908 | -0.45754 |
| C55 | 1.77264  | 0.90742 | -0.47603 | H132 | 1.67134  | 0.96171 | -0.67486 |
| C56 | 1.89131  | 0.95383 | -0.45244 | H133 | 1.47164  | 0.88156 | -0.72226 |
| C57 | 2.00841  | 1.00200 | -0.47542 | H134 | 1.66242  | 0.75854 | -0.61516 |
| C58 | 1.89047  | 0.95385 | -0.40648 | H135 | 1.86298  | 0.8383  | -0.56765 |
| C59 | 1.77498  | 0.90539 | -0.61791 | H136 | 1.83710  | 0.83893 | -0.42959 |
| C60 | 1.76545  | 0.90604 | -0.37908 | H137 | 1.62159  | 0.76013 | -0.38205 |
| C61 | 1.66842  | 0.91624 | -0.66102 | H138 | 1.46161  | 0.88337 | -0.27460 |
| C62 | 1.55818  | 0.87198 | -0.68741 | H139 | 1.67600  | 0.96235 | -0.32184 |
| C63 | 1.55337  | 0.81563 | -0.67121 | H140 | 1.29436  | 0.82338 | -0.24468 |
| C64 | 1.66289  | 0.80424 | -0.62860 | H141 | 1.16138  | 0.68639 | -0.25234 |
| C65 | 1.77333  | 0.84865 | -0.60228 | H142 | 0.51063  | 0.50334 | -0.14986 |
| C66 | 1.75111  | 0.84955 | -0.39487 | H143 | 0.69359  | 0.37701 | -0.01177 |
| C67 | 1.63244  | 0.80570 | -0.36863 | H144 | 0.26450  | 0.36438 | -0.03935 |
| C68 | 1.52669  | 0.81737 | -0.32593 | H145 | 0.32324  | 0.62700 | -0.01177 |
| C69 | 1.54431  | 0.87342 | -0.30953 | H146 | 0.75233  | 0.63962 | -0.03935 |
| C70 | 1.66290  | 0.91713 | -0.33585 | H147 | 0.25207  | 0.45654 | -0.17736 |
| N71 | 1.43711  | 0.76941 | -0.69723 | H148 | 0.04368  | 0.37641 | -0.22397 |
| N72 | 1.40094  | 0.77175 | -0.30005 | H149 | 0.14447  | 0.25776 | -0.11299 |
| C73 | 1.29212  | 0.77904 | -0.26048 | H150 | 0.35050  | 0.33767 | -0.06614 |
| C74 | 1.16711  | 0.73051 | -0.23627 | H151 | 0.66627  | 0.66633 | -0.06614 |
| C75 | 0.42423  | 0.45165 | -0.09134 | H152 | 0.87282  | 0.74631 | -0.11312 |

|     |         |         |          |      |         |         |          |
|-----|---------|---------|----------|------|---------|---------|----------|
| C76 | 0.44355 | 0.45095 | -0.04547 | H153 | 0.97286 | 0.62743 | -0.22395 |
| C77 | 0.50841 | 0.50200 | -0.02280 | H154 | 0.76466 | 0.54745 | -0.17735 |

**Table S7.** Fractional atomic coordinates for the structural model 7 of PyG-COF in AA stacking.

| The structural model 7 of PyG-COF in AA stacking                                                         |          |         |          |      |          |         |          |
|----------------------------------------------------------------------------------------------------------|----------|---------|----------|------|----------|---------|----------|
| $a = 25.30 \text{ \AA}, b = 31.33 \text{ \AA}, c = 3.42 \text{ \AA}, \alpha = \beta = \gamma = 90^\circ$ |          |         |          |      |          |         |          |
| C1                                                                                                       | 0.21130  | 0.40881 | -0.97745 | C78  | 0.57323  | 0.55304 | -0.04547 |
| C2                                                                                                       | 0.37872  | 0.45497 | -0.95171 | C79  | 0.59258  | 0.55235 | -0.09134 |
| C3                                                                                                       | 0.50841  | 0.50200 | -0.97442 | C80  | 0.5084   | 0.50200 | -0.11290 |
| C4                                                                                                       | 0.63810  | 0.54903 | -0.95171 | C81  | 0.41371  | 0.39657 | -0.01955 |
| C5                                                                                                       | 0.80553  | 0.59519 | -0.97745 | C82  | 0.60311  | 0.60743 | -0.01955 |
| C6                                                                                                       | 0.38487  | 0.45431 | -0.90586 | C83  | 0.31329  | 0.40255 | -0.11850 |
| C7                                                                                                       | 0.50841  | 0.50200 | -0.88418 | C84  | 0.70352  | 0.60145 | -0.11850 |
| C8                                                                                                       | 0.63195  | 0.54969 | -0.90586 | C85  | 0.22755  | 0.41208 | -0.16244 |
| C9                                                                                                       | 0.26043  | 0.4062  | -0.87899 | C86  | 0.11195  | 0.36782 | -0.18842 |
| C10                                                                                                      | 0.75636  | 0.59779 | -0.87899 | C87  | 0.07930  | 0.31268 | -0.17095 |
| C11                                                                                                      | 0.85987  | 0.58743 | -0.83574 | C88  | 0.16676  | 0.30252 | -0.12748 |
| C12                                                                                                      | 0.97286  | 0.63186 | -0.80973 | C89  | 0.28177  | 0.34703 | -0.10157 |
| C13                                                                                                      | 0.98319  | 0.68787 | -0.82647 | C90  | 0.73503  | 0.65697 | -0.10157 |
| C14                                                                                                      | 0.87643  | 0.69875 | -0.86926 | C91  | 0.85005  | 0.70148 | -0.12747 |
| C15                                                                                                      | 0.76331  | 0.65416 | -0.89522 | C92  | 0.9375   | 0.69132 | -0.17095 |
| C16                                                                                                      | 0.25351  | 0.34984 | -0.89522 | C93  | 0.90484  | 0.63618 | -0.18842 |
| C17                                                                                                      | 0.14039  | 0.30525 | -0.86926 | C94  | 0.78922  | 0.59191 | -0.16244 |
| C18                                                                                                      | 0.03363  | 0.31613 | -0.82647 | N95  | -0.04553 | 0.26666 | -0.1965  |
| C19                                                                                                      | 0.04396  | 0.37214 | -0.80973 | N96  | 1.06233  | 0.73734 | -0.1965  |
| C20                                                                                                      | 0.15695  | 0.41657 | -0.83574 | H97  | -0.07803 | 0.42356 | -0.98521 |
| N21                                                                                                      | -0.08386 | 0.26973 | -0.80072 | H98  | 0.21647  | 0.3674  | -0.95756 |
| N22                                                                                                      | 1.10065  | 0.73426 | -0.80072 | H99  | 1.09486  | 0.58044 | -0.98521 |
| C23                                                                                                      | -0.19407 | 0.27658 | -0.76117 | H100 | 0.80036  | 0.63660 | -0.95756 |
| C24                                                                                                      | -0.30948 | 0.22755 | -0.73673 | H101 | 0.51132  | 0.50312 | -0.84722 |
| C25                                                                                                      | 1.21089  | 0.72742 | -0.76117 | H102 | 0.85215  | 0.54225 | -0.82149 |
| C26                                                                                                      | 1.32630  | 0.77645 | -0.73673 | H103 | 1.05721  | 0.62272 | -0.77474 |
| C27                                                                                                      | -0.87592 | 0.05026 | -0.54460 | H104 | 0.88137  | 0.74417 | -0.88314 |
| C28                                                                                                      | -0.87691 | 0.05035 | -0.59054 | H105 | 0.67593  | 0.66402 | -0.93000 |
| C29                                                                                                      | -0.99159 | 0.00200 | -0.61208 | H106 | 0.34091  | 0.33998 | -0.93000 |
| C30                                                                                                      | -0.87450 | 0.05017 | -0.45244 | H107 | 0.13494  | 0.25975 | -0.88298 |
| C31                                                                                                      | -0.75583 | 0.09658 | -0.47603 | H108 | -0.04016 | 0.38147 | -0.77476 |
| C32                                                                                                      | -0.75663 | 0.09665 | -0.52104 | H109 | 0.16470  | 0.46175 | -0.82149 |
| C33                                                                                                      | -0.99160 | 0.00200 | -0.38496 | H110 | -0.20081 | 0.32105 | -0.74545 |
| C34                                                                                                      | -0.87366 | 0.05015 | -0.40648 | H111 | -0.30211 | 0.18304 | -0.75240 |
| C35                                                                                                      | -0.75817 | 0.09861 | -0.61791 | H112 | 1.21767  | 0.68296 | -0.74544 |
| C36                                                                                                      | -0.74864 | 0.09796 | -0.37908 | H113 | 1.31894  | 0.82096 | -0.75240 |
| C37                                                                                                      | -0.75652 | 0.15535 | -0.60228 | H114 | -1.16023 | 0.07108 | -0.54428 |
| C38                                                                                                      | -0.64608 | 0.19976 | -0.62860 | H115 | -0.99458 | 0.00074 | -0.64904 |

|     |          |         |          |      |          |         |          |
|-----|----------|---------|----------|------|----------|---------|----------|
| C39 | -0.53656 | 0.18837 | -0.67121 | H116 | -0.65564 | 0.13545 | -0.45831 |
| C40 | -0.54136 | 0.13202 | -0.68741 | H117 | -0.65737 | 0.13557 | -0.53879 |
| C41 | -0.65163 | 0.08775 | -0.66102 | H118 | -0.99476 | 0.00071 | -0.34800 |
| C42 | -0.64612 | 0.08686 | -0.33585 | H119 | -0.84617 | 0.16570 | -0.56765 |
| C43 | -0.52750 | 0.13058 | -0.30953 | H120 | -0.64509 | 0.24554 | -0.61532 |
| C44 | -0.50988 | 0.18663 | -0.32593 | H121 | -0.45499 | 0.12227 | -0.72224 |
| C45 | -0.61564 | 0.19830 | -0.36863 | H122 | -0.65459 | 0.04228 | -0.67485 |
| C46 | -0.73431 | 0.15445 | -0.39487 | H123 | -0.65927 | 0.04164 | -0.32185 |
| N47 | -0.42030 | 0.23459 | -0.69723 | H124 | -0.44456 | 0.12079 | -0.27459 |
| N48 | -0.38413 | 0.23225 | -0.30005 | H125 | -0.60534 | 0.24379 | -0.38222 |
| C49 | -0.27532 | 0.22496 | -0.26048 | H126 | -0.82031 | 0.16507 | -0.42959 |
| C50 | -0.15031 | 0.27349 | -0.23627 | H127 | -0.27757 | 0.18062 | -0.24468 |
| C51 | 1.89372  | 0.95365 | -0.59054 | H128 | -0.14458 | 0.31761 | -0.25234 |
| C52 | 1.89273  | 0.95374 | -0.54460 | H129 | 2.29397  | 0.98168 | -0.52160 |
| C53 | 2.00841  | 1.00200 | -0.52160 | H130 | 1.67418  | 0.86843 | -0.53879 |
| C54 | 1.77344  | 0.90735 | -0.52104 | H131 | 1.67377  | 0.86908 | -0.45754 |
| C55 | 1.77264  | 0.90742 | -0.47603 | H132 | 1.67134  | 0.96171 | -0.67486 |
| C56 | 1.89131  | 0.95383 | -0.45244 | H133 | 1.47164  | 0.88156 | -0.72226 |
| C57 | 2.00841  | 1.00200 | -0.47542 | H134 | 1.66242  | 0.75854 | -0.61516 |
| C58 | 1.89047  | 0.95385 | -0.40648 | H135 | 1.86298  | 0.83830 | -0.56765 |
| C59 | 1.77498  | 0.90539 | -0.61791 | H136 | 1.83710  | 0.83893 | -0.42959 |
| C60 | 1.76545  | 0.90604 | -0.37908 | H137 | 1.62159  | 0.76013 | -0.38205 |
| C61 | 1.66842  | 0.91624 | -0.66102 | H138 | 1.46161  | 0.88337 | -0.2746  |
| C62 | 1.55818  | 0.87198 | -0.68741 | H139 | 1.67600  | 0.96235 | -0.32184 |
| C63 | 1.55337  | 0.81563 | -0.67121 | H140 | 1.29436  | 0.82338 | -0.24468 |
| C64 | 1.66289  | 0.80424 | -0.62860 | H141 | 1.16138  | 0.68639 | -0.25234 |
| C65 | 1.77333  | 0.84865 | -0.60228 | H142 | 0.51063  | 0.50334 | -0.14986 |
| C66 | 1.75111  | 0.84955 | -0.39487 | H143 | 0.69359  | 0.37701 | -0.01177 |
| C67 | 1.63244  | 0.80570 | -0.36863 | H144 | 0.26450  | 0.36438 | -0.03935 |
| C68 | 1.52669  | 0.81737 | -0.32593 | H145 | 0.32324  | 0.62700 | -0.01177 |
| C69 | 1.54431  | 0.87342 | -0.30953 | H146 | 0.75233  | 0.63962 | -0.03935 |
| C70 | 1.66290  | 0.91713 | -0.33585 | H147 | 0.25207  | 0.45654 | -0.17736 |
| N71 | 1.43711  | 0.76941 | -0.69723 | H148 | 0.04368  | 0.37641 | -0.22397 |
| N72 | 1.40094  | 0.77175 | -0.30005 | H149 | 0.14447  | 0.25776 | -0.11299 |
| C73 | 1.29212  | 0.77904 | -0.26048 | H150 | 0.35050  | 0.33767 | -0.06614 |
| C74 | 1.16711  | 0.73051 | -0.23627 | H151 | 0.66627  | 0.66633 | -0.06614 |
| C75 | 0.42423  | 0.45165 | -0.09134 | H152 | 0.87282  | 0.74631 | -0.11312 |
| C76 | 0.44355  | 0.45095 | -0.04547 | H153 | 0.97286  | 0.62743 | -0.22395 |
| C77 | 0.50841  | 0.50200 | -0.02280 | H154 | 0.76466  | 0.54745 | -0.17735 |

**Table S8.** Fractional atomic coordinates for the structural model 8 of PyG-COF in AA stacking.

| The structural model 8 of PyG-COF in AA stacking                                                                      |          |         |          |     |          |        |          |
|-----------------------------------------------------------------------------------------------------------------------|----------|---------|----------|-----|----------|--------|----------|
| $a = 22.86 \text{ \AA}, b = 30.40 \text{ \AA}, c = 3.64 \text{ \AA}, \alpha = \beta = 90^\circ, \gamma = 89.79^\circ$ |          |         |          |     |          |        |          |
| C1                                                                                                                    | -7.13681 | 2.34433 | -0.92718 | C78 | -8.28083 | 2.7646 | -0.73986 |



|     |          |         |          |      |          |          |          |
|-----|----------|---------|----------|------|----------|----------|----------|
| C2  | -7.83759 | 2.64642 | -0.92718 | N79  | -8.37143 | 2.74253  | -0.70221 |
| C3  | -7.93119 | 2.61904 | -0.88741 | C80  | -7.41865 | 2.46617  | -0.00826 |
| C4  | -8.01714 | 2.65191 | -0.85008 | C81  | -7.35078 | 2.43708  | -0.04865 |
| C5  | -8.01336 | 2.71322 | -0.85188 | C82  | -7.21977 | 2.37863  | -0.04868 |
| C6  | -7.92314 | 2.74092 | -0.89136 | C83  | -7.55563 | 2.52459  | -0.00826 |
| C7  | -7.83697 | 2.70787 | -0.92864 | C84  | -7.62342 | 2.55369  | -0.04865 |
| C8  | -7.13746 | 2.28288 | -0.92864 | C85  | -7.55258 | 2.52392  | -0.08792 |
| C9  | -7.05137 | 2.24984 | -0.89136 | C86  | -7.42151 | 2.46685  | -0.08792 |
| C10 | -6.96113 | 2.27753 | -0.85188 | C87  | -7.7544  | 2.61213  | -0.04868 |
| C11 | -6.95732 | 2.33884 | -0.85008 | C88  | -7.13668 | 2.34434  | -0.08934 |
| C12 | -7.04326 | 2.37172 | -0.88740 | C89  | -7.62349 | 2.55368  | -0.96787 |
| C13 | -6.25464 | 2.11212 | -0.54868 | C90  | -7.7545  | 2.61213  | -0.96783 |
| C14 | -6.12352 | 2.05368 | -0.54865 | C91  | -7.35085 | 2.43707  | -0.96786 |
| C15 | -6.05561 | 2.02459 | -0.50826 | C92  | -7.42169 | 2.46684  | -0.92859 |
| C16 | -6.12349 | 2.05369 | -0.46786 | C93  | -7.55276 | 2.52391  | -0.92859 |
| C17 | -6.25458 | 2.11212 | -0.46783 | C94  | -7.21986 | 2.37863  | -0.96783 |
| C18 | -6.31394 | 2.13973 | -0.50826 | C95  | 0.83945  | -0.64898 | -1.00826 |
| C19 | -6.05273 | 2.02392 | -0.58792 | C96  | 0.18628  | -0.36026 | -1.00826 |
| C20 | -6.05261 | 2.02392 | -0.42859 | H97  | -7.93778 | 2.56927  | -0.88528 |
| C21 | -6.3378  | 2.14641 | -0.58934 | H98  | -8.09071 | 2.62894  | -0.81800 |
| C22 | -6.33771 | 2.14642 | -0.42718 | H99  | -7.91958 | 2.79071  | -0.89327 |
| C23 | -6.33732 | 2.20786 | -0.58788 | H100 | -7.76548 | 2.73142  | -0.96055 |
| C24 | -6.42353 | 2.24090 | -0.62516 | H101 | -7.20891 | 2.25934  | -0.96056 |
| C25 | -6.51372 | 2.21320 | -0.66464 | H102 | -7.05457 | 2.20003  | -0.89307 |
| C26 | -6.51736 | 2.15189 | -0.66643 | H103 | -6.88386 | 2.36197  | -0.81806 |
| C27 | -6.43132 | 2.11902 | -0.62911 | H104 | -7.03674 | 2.42149  | -0.88527 |
| C28 | -6.43121 | 2.11903 | -0.38740 | H105 | -6.41538 | 2.18694  | -0.50726 |
| C29 | -6.51720 | 2.15190 | -0.35008 | H106 | -6.10267 | 2.04651  | -0.62083 |
| C30 | -6.51352 | 2.21321 | -0.35188 | H107 | -6.31668 | 2.02447  | -0.40848 |
| C31 | -6.42335 | 2.24091 | -0.39136 | H108 | -5.83638 | 2.04861  | -0.40893 |
| C32 | -6.33719 | 2.20787 | -0.42864 | H109 | -6.26591 | 2.23141  | -0.55597 |
| N33 | -6.87191 | 2.24250 | -0.81430 | H110 | -6.42047 | 2.29071  | -0.62344 |
| C34 | -6.78126 | 2.26457 | -0.77665 | H111 | -6.59077 | 2.12874  | -0.69845 |
| C35 | -6.69365 | 2.22616 | -0.73986 | H112 | -6.43775 | 2.06925  | -0.63124 |
| N36 | -6.60302 | 2.24823 | -0.70222 | H113 | -6.43765 | 2.06926  | -0.38527 |
| C37 | -6.78102 | 2.26458 | -0.23986 | H114 | -6.59075 | 2.12893  | -0.31799 |
| C38 | -6.69342 | 2.22617 | -0.27665 | H115 | -6.41983 | 2.29070  | -0.39327 |
| N39 | -6.60279 | 2.24824 | -0.31430 | H116 | -6.26579 | 2.23142  | -0.46056 |
| C40 | -7.83742 | 2.64643 | -0.08934 | H117 | -6.76999 | 2.31406  | -0.77229 |
| C41 | -7.04311 | 2.37173 | -0.12911 | H118 | -6.70496 | 2.17668  | -0.74424 |
| C42 | -6.95712 | 2.33885 | -0.16643 | H119 | -6.76974 | 2.31407  | -0.24422 |
| C43 | -6.96090 | 2.27754 | -0.16464 | H120 | -6.70472 | 2.17669  | -0.27227 |
| C44 | -7.05116 | 2.24985 | -0.12516 | H121 | -7.03660 | 2.42150  | -0.13124 |
| C45 | -7.13730 | 2.28289 | -0.08788 | H122 | -6.88347 | 2.36181  | -0.19851 |
| C46 | -7.83669 | 2.70788 | -0.08788 | H123 | -7.05478 | 2.20006  | -0.12325 |

|     |          |         |          |      |          |          |          |
|-----|----------|---------|----------|------|----------|----------|----------|
| C47 | -7.92279 | 2.74093 | -0.12516 | H124 | -7.20941 | 2.26005  | -0.05570 |
| C48 | -8.01309 | 2.71324 | -0.16464 | H125 | -7.76517 | 2.73142  | -0.05597 |
| C49 | -8.01694 | 2.65192 | -0.16643 | H126 | -7.91954 | 2.79074  | -0.12344 |
| C50 | -7.93105 | 2.61905 | -0.12911 | H127 | -8.09040 | 2.62878  | -0.19845 |
| N51 | -6.87166 | 2.24251 | -0.20222 | H128 | -7.93769 | 2.56928  | -0.13124 |
| C52 | -8.71951 | 2.87865 | -0.46783 | H129 | -8.55877 | 2.80383  | -0.50926 |
| C53 | -8.85062 | 2.93709 | -0.46786 | H130 | -8.65734 | 2.96631  | -0.40848 |
| C54 | -8.91853 | 2.96618 | -0.50826 | H131 | -9.13764 | 2.94217  | -0.40893 |
| C55 | -8.85068 | 2.93709 | -0.54865 | H132 | -8.87164 | 2.94426  | -0.62083 |
| C56 | -8.71957 | 2.87865 | -0.54868 | H133 | -8.70836 | 2.75937  | -0.46056 |
| C57 | -8.66021 | 2.85104 | -0.50826 | H134 | -8.55389 | 2.70006  | -0.39308 |
| C58 | -8.92144 | 2.96686 | -0.42859 | H135 | -8.38337 | 2.86202  | -0.31806 |
| C59 | -8.92153 | 2.96685 | -0.58792 | H136 | -8.53630 | 2.92152  | -0.38528 |
| C60 | -8.63637 | 2.84436 | -0.42717 | H137 | -8.53647 | 2.92151  | -0.63124 |
| C61 | -8.63645 | 2.84435 | -0.58934 | H138 | -8.38344 | 2.86183  | -0.69852 |
| C62 | -8.63693 | 2.78291 | -0.42864 | H139 | -8.55434 | 2.70007  | -0.62325 |
| C63 | -8.55076 | 2.74987 | -0.39136 | H140 | -8.70848 | 2.75936  | -0.55597 |
| C64 | -8.46053 | 2.77757 | -0.35188 | H141 | -8.20424 | 2.67671  | -0.24423 |
| C65 | -8.4568  | 2.83888 | -0.35008 | H142 | -8.26924 | 2.81409  | -0.27226 |
| C66 | -8.54281 | 2.87175 | -0.38741 | H143 | -8.20443 | 2.67669  | -0.77229 |
| C67 | -8.54295 | 2.87174 | -0.62911 | H144 | -8.26956 | 2.81408  | -0.74425 |
| C68 | -8.45699 | 2.83887 | -0.66643 | H145 | -7.84874 | 2.50731  | -0.00827 |
| C69 | -8.46068 | 2.77756 | -0.66464 | H146 | -7.60238 | 2.54651  | -0.12083 |
| C70 | -8.55084 | 2.74986 | -0.62516 | H147 | -7.37162 | 2.44427  | -0.12083 |
| C71 | -8.63702 | 2.78291 | -0.58788 | H148 | -7.91752 | 2.53680  | -0.9678  |
| N72 | -8.10230 | 2.74827 | -0.20222 | H149 | -7.46021 | 2.62889  | -0.96738 |
| C73 | -8.19297 | 2.72620 | -0.23987 | H150 | -7.37189 | 2.44425  | -0.89568 |
| C74 | -8.28057 | 2.76461 | -0.27665 | H151 | -7.60266 | 2.54650  | -0.89568 |
| N75 | -8.37125 | 2.74254 | -0.31430 | H152 | 0.94079  | -0.69619 | -1.00726 |
| N76 | -8.10260 | 2.74825 | -0.81430 | H153 | -0.10962 | -0.34389 | -1.00827 |
| C77 | -8.19321 | 2.72618 | -0.77665 | H154 | 0.36983  | -0.32013 | -1.00570 |

**Table S9.** The detailed information of N 1s XPS spectra of different COFs.

| Sample     | Functional group | Position (eV) | Area    | FWHM (eV) |
|------------|------------------|---------------|---------|-----------|
| PyG-COF    | Imine N          | 399.5         | 1497.39 | 2.03      |
| PyG-Im-COF | Imine N          | 399.5         | 1652.47 | 1.74      |
|            | Imidazolium N    | 401.8         | 242.63  | 1.75      |

**Table S10.** The HER performance comparison of PyG-Im-COF with other nitrogen-containing heterocycle-based COFs.

| COFs | Photoactive units | Pt contents (wt%) | Electron donors | Irradiation condition | HER ( $\mu\text{mol g}^{-1} \text{h}^{-1}$ ) | AQY | Ref. |
|------|-------------------|-------------------|-----------------|-----------------------|----------------------------------------------|-----|------|
|------|-------------------|-------------------|-----------------|-----------------------|----------------------------------------------|-----|------|

|               |                             |      |      |                    |      |                |                  |
|---------------|-----------------------------|------|------|--------------------|------|----------------|------------------|
| BT-TAPT-COF   | benzothiadiazole            | 8    | AC   | $\lambda > 420$ nm | 919  | 0.19% (410 nm) | [2]              |
| Py-CITP-BTCOF | dichlorobenzo[c]thiadiazole | 5    | AC   | $\lambda > 420$ nm | 8875 | 8.45% (420 nm) | [3]              |
| PyTA-BC-PhCOF | 9,9'-bicarbazole            | 3.7  | AC   | $\lambda > 420$ nm | 2763 | 1.83% (420 nm) | [4]              |
| PyTz-COF      | thiazolo[5,4-d]thiazole     | 3    | AC   | AM 1.5             | 2072 | -              | [5]              |
| PETZ-COF      | thiazolo[5,4-d]thiazole     | 3    | AC   | $\lambda > 420$ nm | 7324 | 3.64% (520 nm) | [6]              |
| BtCOF150      | benzothiadiazole            | 1    | TEOA | $\lambda > 400$ nm | 750  | 0.2% (420 nm)  | [7]              |
| N1-COF        | pyridyl                     | 1.7  | TEOA | $\lambda > 420$ nm | 90   | 0.08% (450 nm) | [8]              |
| N2-COF        | pyrimidyl                   | 0.94 | TEOA | $\lambda > 420$ nm | 438  | 0.19% (450 nm) | [8]              |
| N3-COF        | triazine                    | 0.68 | TEOA | $\lambda > 420$ nm | 1703 | 0.44% (450 nm) | [8]              |
| PyG-Im-COF    | Imidazolium                 | 0.57 | AC   | $\lambda > 420$ nm | 1866 | 0.39% (420 nm) | <b>This work</b> |

#### ***Section S4. References***

- (1) P. J. Rayner, P. Norcott, K. M. Appleby, W. Iali, R. O. John, S. J. Hart, A. C. Whitwood and S. B. Duckett, *Nat. Commun.*, 2018, **9**, 4251.
- (2) G. B. Wang, S. Li, C. X. Yan, Q. Q. Lin, F. C. Zhu, Y. Geng and Y. B. Dong, *Chem. Commun.*, 2020, **56**, 12612-12615.
- (3) W. B. Chen, L. Wang, D. Z. Mo, F. He, Z. L. Wen, X. J. Wu, H. X. Xu and L. Chen, *Angew. Chem., Int. Ed.*, 2020, **59**, 16902-16909.
- (4) A. F. M. El-Mahdy, A. M. Elewa, S.-W. Huang, H.-H. Chou and S.-W. Kuo, *Adv. Opt. Mater.*, 2020, **8**, 2000641.
- (5) W. Q. Li, X. F. Huang, T. W. Zeng, Y. H. A. Liu, W. B. Hu, H. Yang, Y. B. Zhang and K. Wen, *Angew. Chem., Int. Ed.*, 2021, **60**, 1869-1874.
- (6) H. P. Yu, J. Z. Zhang, X. R. Yan, C. G. Wu, X. R. Zhu, B. W. Li, T. F. Li, Q. Q. Guo, J. F. Gao, M. J. Hu and J. Yang, *J. Mater. Chem. A*, 2022, **10**, 11010-11018.
- (7) S. Ghosh, A. Nakada, M. A. Springer, T. Kawaguchi, K. Suzuki, H. Kaji, I. Baburin, A. Kuc, T. Heine, H. Suzuki, R. Abe and S. Seki, *J. Am. Chem. Soc.*, 2020, **142**, 9752-9762.
- (8) V. S. Vyas, F. Haase, L. Stegbauer, G. Savasci, F. Podjaski, C. Ochsenfeld and B. V. Lotsch, *Nat. Commun.*, 2015, **6**, 8508.
